# Supplementary material for: Genetically Predicted Vegetable Intake and Cardiovascular Diseases and Risk Factors: An Investigation with Mendelian Randomization
Source: MDPI journal article supplement (doi:10.3390/nu15173682), 2023-08-22
Supplement: s1 [file s1]

## Supplementary methods

Supplementary table S1: Characteristics of the included genome-wide association studies.

Supplementary figure S1: The process of SNP selection.

Supplementary table S2: Biological functions of the SNPs associated with cooked and raw vegetable intake.

Supplementary figure S2: Flowchart of participant selection in UK Biobank for one-sample Mendelian randomization analysis.

Supplementary table S3: The ICD9 and ICD10 codes to confirm the cardiovascular outcomes in UK Biobank.

Supplementary table S4: Characteristics of the included SNPs included in two-sample multivariable Mendelian randomization.

Supplementary table S5: Baseline characteristics of the UK Biobank participants included in one-sample Mendelian randomization.

Supplementary figure S3: Histograms for the distribution of vegetable intake genetic risk scores (GRS).

Supplementary table S6: Associations (showing p values) between vegetable intake genetic risk scores and baseline characteristics in UK Biobank.

Supplementary table S7: Associations between vegetable intake and cardiovascular risk in multivariable one-sample Mendelian randomization in UK Biobank.

Supplementary table S8: Associations between vegetable intake and cardiovascular risk in univariable one-sample Mendelian randomization in UK Biobank.

Supplementary table S9: Associations between vegetable intake and cardiovascular risk in univariable two-sample Mendelian randomization in UK Biobank.

Supplementary table S10: Associations between vegetable intake and cardiovascular risk in meta-analysis excluding UK Biobank effect estimates.

Supplementary table S11: Associations between vegetable intake and cardiovascular risk in meta-analysis of univariable Mendelian randomization.

Supplementary figure S4: Associations between vegetable intake and cardiovascular risk in meta-analysis of univariable Mendelian randomization.

Supplementary table S12: The basic characteristics of the SNPs for cooked and raw vegetable intake included in Mendelian randomization analysis for cardiometabolic risk factors.

Supplementary table S13: Association between vegetable intake and cardiometabolic risk factors in univariable Mendelian randomization.

Supplementary figure S5: Forest plots for the leave-one-out analysis for selected genetic associations between vegetable intake and cardiometabolic risk factors.

Supplementary table S14: Association between vegetable intake and body mass index, serum lipids in multivariable Mendelian randomization.

## Supplementary methods

### Covariate measurement in UK Biobank

UK Biobank measured a range of baseline characteristics. Physical activity was assessed using the International Physical Activity Questionnaire and categorized into low, moderate, and high activity levels [1]. Briefly, high level of physical activity is defined as vigorous-intensity activity on at least 3 days achieving a minimum total physical activity of at least 1500 metabolic equivalent of task (MET)-minutes/week, or 7 days of any combination of walking, moderate-intensity or vigorous-intensity activities achieving a minimum total physical activity of at least 3000 MET-minutes/week; moderate level is defined as 3 or more days of vigorous-intensity activity of at least 20 minutes per day, or 5 or more days of moderate-intensity activity and/or walking of at least 30 minutes per day, or 5 or more days of any combination of walking, moderate-intensity or vigorous intensity activities achieving a minimum total physical activity of at least 600 MET-minutes/week; otherwise low level. Smoking and drinking status were coded as never, previous or current users.

Blood pressure was measured on their left forearm with Omron 705 IT Electronic Blood Pressure Monitor when participants were at resting status. Two readings with more than one minute lap were taken and averaged as the final reading. A sphygmomanometer with an inflatable cuff is used in conjunction with a stethoscope only when the electronic monitor failed to produce a reading. Body mass index (BMI) was calculated as body weight (kilograms) divided by height squared (meters). Drinking and smoking status was self-reported and categorized into previous users, current users and never users.

Frequency of intake of oily fish ( $< 1$ ,  $1$ ,  $\geq 2$  times/week), processed meat ( $0$ ,  $\leq 1$ ,  $\geq 2$  times per week) and red meat were measured with baseline dietary questionnaire. Intake of red meat was the sum of pork, beef and mutton/lamb, and was transformed into a continuous variable using the method proposed by Bradbury et al. [2]. All answers of “unknown”, “do not know”, “prefer not to say” for each categorical variable were combined into one category of “unknown” and included in analyses as a separate category.

### Multivariable one-sample Mendelian randomization (MR)

The effects of cooked and raw vegetable intake were assessed jointly, so their effects were adjusted for each other. Two-stage least square method was used. In the first stage, we fitted a multivariate regression in controls only (participants without the outcome):

$$(cooked\ vegetable\ intake_{observed}, raw\ vegetable\ intake_{observed}) \sim \beta_0 + \beta_1 * GRS_{cooked} + \beta_2 * GRS_{raw} + \beta_3 * covariates \text{ (S1)}$$

in which the covariates include sex, age, age square, genotype batch, assessment centre and first 20 genetic principle components. From this fitted model, we obtained the genetically predicted cooked and raw vegetable intakes, and used them in the second stage of logistic regression, as below:

$$CVD\ outcome \sim \theta_0 + \theta_1 * cooked\ vegetable\ intake_{predicted} + \theta_2 * raw\ vegetable\ intake_{predicted} + \theta_3 * covariates \text{ (S2)}$$

in which the covariates include sex, age, age square, genotype batch, assessment centre and first 20 genetic principle components. The coefficients  $\theta_1$  and  $\theta_2$  are the MR estimates for cooked vegetable intake and raw vegetable intake, respectively.

### Univariable one-sample MR

The effects of raw and cooked vegetable intakes were assessed in separate models, so their effects were not adjusted for each other. Two-stage least square method was used to assess the association, in which two stages of regression were performed. Take cooked vegetable intake as an example, the first stage regression was fitted as a linear regression:

$$\text{cooked vegetable intake}_{\text{observed}} \sim \beta_0 + \beta_1 * GRS_{\text{cooked}} + \beta_2 * \text{covariates} \text{ (S3)}$$

in which the covariates include sex, age, age square, genotype batch, assessment centre and first 20 genetic principle components. From this fitted model (1), we obtained the genetically predicted cooked vegetable intake, and use it in the second stage, which was a logistic regression, as below:

$$\text{CVD outcome} \sim \theta_0 + \theta_1 * \text{cooked vegetable intake}_{\text{predicted}} + \theta_2 * \text{covariates} \text{ (S4)}$$

in which the covariates include sex, age, age square, genotype batch, assessment centre and first 20 genetic principle components. The coefficient of the predicted cooked vegetable intake,  $\theta_1$ , was the final MR estimate for the effect. Using similar method we estimated the effect of raw vegetable intake.

### Sensitivity analysis for one-sample MR

In the above models, the adjustment of sex, age, age square, genotype batch, assessment centre and genetic principle components was recommended [3]. As we observed that in UK Biobank the GRS of vegetable intake were associated with physical activity level, smoking, drinking and oily-fish intake, we additionally adjusted for these covariates in the second stage regression, as one of the sensitivity analyses.

We also fitted Cox regression in the second stage regression, instead of logistic regression, in sensitivity analysis. To fit the cox model, we excluded the participants with baseline cardiovascular diseases. Participants were censored at date of hospitalization, date of death, or the last of follow-up (31 March 2021 for participants from England and Scotland, and 28 February 2018 for participants from Wales). Similar one-sample and two-sample analysis were performed.

### Some formulas

Proportion of the phenotypic variance explained by a SNP:

$$R^2 = 2 * EAF * (1 - EAF) * \text{beta}^2$$

in which, EAF is the effect allele frequency, and beta is the association between the SNP and the phenotype in standard deviation unit.

F statistics

$$F = \left(\frac{\text{beta}}{\text{se}}\right)^2$$

In which, beta is the association between the SNP and the phenotype, and se is the according standard error.

### References:

- 1 World Health Organization. Global Physical Activity Questionnaire Analysis Guide. [https://www.who.int/ncds/surveillance/steps/resources/GPAQ\\_Analysis\\_Guide.pdf](https://www.who.int/ncds/surveillance/steps/resources/GPAQ_Analysis_Guide.pdf)

- 2 Bradbury KE, Young HJ, Guo W, *et al.* Dietary assessment in UK Biobank: an evaluation of the performance of the touchscreen dietary questionnaire. *J Nutr Sci* 2018;**7**:e6.  
doi:10.1017/jns.2017.66
- 3 Burgess S, Thompson SG. Multivariable Mendelian Randomization: The Use of Pleiotropic Genetic Variants to Estimate Causal Effects. *American Journal of Epidemiology* 2015;**181**:251–60.  
doi:10.1093/aje/kwu283

Supplementary table S1: Characteristics of included genome-wide association studies.

| Phenotype                     | Sample size             | Population                                  | Phenotype definition                                                                                           | GWAS adjustment                                                                      |
|-------------------------------|-------------------------|---------------------------------------------|----------------------------------------------------------------------------------------------------------------|--------------------------------------------------------------------------------------|
| <b>Exposure:</b>              |                         |                                             |                                                                                                                |                                                                                      |
| <b>vegetable intake</b>       |                         |                                             |                                                                                                                |                                                                                      |
| Niarchou 2020                 | 335576                  | European-ancestry individuals in UK Biobank | Cooked and raw vegetable intakes as continuous variables, truncated at 3.5 standard deviations.                | Age, sex, month of assessment, assessment centre, batch, 100 genetic PCs             |
| Cole 2020                     | 455146                  | European-ancestry individuals in UK Biobank | Cooked and raw vegetable intakes as continuous variables, using inverse rank normal transformation.            | Age, sex                                                                             |
| Canela-Xandri 2018            | 452264                  | European-ancestry individuals in UK Biobank | Cooked and raw vegetable intakes as continuous variables, truncated at 10 standard deviations.                 | Age, sex, array batch, assessment centre, age square, and the leading 20 genetic PCs |
| <b>Outcome:</b>               |                         |                                             |                                                                                                                |                                                                                      |
| <b>Coronary heart disease</b> |                         |                                             |                                                                                                                |                                                                                      |
| CARDIoGRA MplusC4D consortium | 184305 (60801 /123504)* | European-ancestry individuals               | Coronary artery diseases                                                                                       | --                                                                                   |
| FinnGen                       | 218792 (21012 /197780)  | European-ancestry individuals               | Major coronary heart disease event. (I9_CHD) ICD10: I2[1-5] I46 R96 R98. ICD9: 41[0-4] 798. ICD8: 41[0-4] 798. | Age, sex, ancestry principal components and genotyping batch                         |
| <b>Stroke</b>                 |                         |                                             |                                                                                                                |                                                                                      |

|                              |                                |                                      |                                                                                                                                                                                   |                                                                 |
|------------------------------|--------------------------------|--------------------------------------|-----------------------------------------------------------------------------------------------------------------------------------------------------------------------------------|-----------------------------------------------------------------|
| MEGASTRO<br>KE<br>consortium | 446696<br>(40585 /406111) *    | European-<br>ancestry<br>individuals | Any stroke                                                                                                                                                                        | Age, sex, ancestry principle components<br>1-10, study site     |
| FinnGen                      | 212947<br>(12632 /200315)<br>* | European-<br>ancestry<br>individuals | Stroke, including subarachnoid haemorrhage.<br>(I9_STR_SAH)<br>ICD10: I60 I61 I63 I64.<br>ICD9:430 431 4330A 4331A 4339A 4340A 43<br>41A 4349A 436.<br>ICD8: 430 431 433 434 436. | Age, sex, ancestry principal components<br>and genotyping batch |
| <b>Ischaemic stroke</b>      |                                |                                      |                                                                                                                                                                                   |                                                                 |
| MEGASTRO<br>KE<br>consortium | 440328<br>(34217 /406111) *    | European-<br>ancestry<br>individuals | Any ischemic stroke                                                                                                                                                               | Age, sex, ancestry principle components<br>1-10, study site     |
| FinnGen                      | 212774<br>(10551 /202223) *    | European-<br>ancestry<br>individuals | Ischaemic stroke, excluding all haemorrhages.<br>(I9_STR_EXH)<br>ICD10: I63 I64.<br>ICD9:<br>4330A 4331A 4339A 4340A 4341A 4349A 43<br>6. ICD8: 433 434 436.                      | Age, sex, ancestry principal components<br>and genotyping batch |
| <b>Heart failure</b>         |                                |                                      |                                                                                                                                                                                   |                                                                 |
| HERMES<br>consortium<br>§    | 977323<br>(47309 /930014) *    | European-<br>ancestry<br>individuals | Heart failure (I9_HEARTFAIL_NS)                                                                                                                                                   | Age, sex, ancestry principal components                         |
| FinnGen                      | 195091<br>(23701 /171390) *    | European-<br>ancestry<br>individuals | Heart failure. ICD10: I50 I110 I130 I132. ICD9:<br>4029B 428                                                                                                                      | Age, sex, ancestry principal components<br>and genotyping batch |

### Atrial Fibrillation

|                |                           |                               |                                              |                                                              |
|----------------|---------------------------|-------------------------------|----------------------------------------------|--------------------------------------------------------------|
| Nielson 2018 # | 1030836 (60662 /970174) * | European-ancestry individuals | Atrial fibrillation (I9_AF)                  | --                                                           |
| FinnGen        | 116926 (22068 /94858) *   | European-ancestry individuals | Atrial fibrillation. ICD10: I48. ICD9: 4273. | Age, sex, ancestry principal components and genotyping batch |

### Cardiometabolic risk factors TC, mg/dL

|                           |        |                                                                  |                                                              |                                                    |
|---------------------------|--------|------------------------------------------------------------------|--------------------------------------------------------------|----------------------------------------------------|
| GLGC 2013 (PMID 24097068) | 188578 | European-ancestry individuals (not on lipid-lowering medication) | Blood lipid levels were measured after > 8 hours of fasting. | Age, sex, age square, genetic principle components |
|---------------------------|--------|------------------------------------------------------------------|--------------------------------------------------------------|----------------------------------------------------|

### HDL, mg/dL

|                           |        |                                                                  |                                                             |                                                    |
|---------------------------|--------|------------------------------------------------------------------|-------------------------------------------------------------|----------------------------------------------------|
| GLGC 2013 (PMID 24097068) | 188578 | European-ancestry individuals (not on lipid-lowering medication) | Blood lipid levels were measured after > 8 hours of fasting | Age, sex, age square, genetic principle components |
|---------------------------|--------|------------------------------------------------------------------|-------------------------------------------------------------|----------------------------------------------------|

### LDL, mg/dL

|                           |        |                                                                  |                                                             |                                                    |
|---------------------------|--------|------------------------------------------------------------------|-------------------------------------------------------------|----------------------------------------------------|
| GLGC 2013 (PMID 24097068) | 188578 | European-ancestry individuals (not on lipid-lowering medication) | Blood lipid levels were measured after > 8 hours of fasting | Age, sex, age square, genetic principle components |
|---------------------------|--------|------------------------------------------------------------------|-------------------------------------------------------------|----------------------------------------------------|

### TG, mg/dL

|                                  |        |                                                                               |                                                                                                                                          |                                                                                          |
|----------------------------------|--------|-------------------------------------------------------------------------------|------------------------------------------------------------------------------------------------------------------------------------------|------------------------------------------------------------------------------------------|
| GLGC 2013<br>(PMID<br>24097068)  | 188578 | European-<br>ancestry<br>individuals (not<br>on lipid-lowering<br>medication) | Blood lipid levels were measured after > 8 hours<br>of fasting                                                                           | Age, sex, age square, genetic principle<br>components                                    |
| <b>BMI, kg/m<sup>2</sup></b>     |        |                                                                               |                                                                                                                                          |                                                                                          |
| Locke 2015<br>(PMID<br>25673413) | 339224 | European-<br>ancestry<br>individuals                                          | Measured or self-reported weight in kilogram<br>divided by height square in metre                                                        | Age, sex, age square, genetic principle<br>components, study specific covariates         |
| <b>FG, mmol/L</b>                |        |                                                                               |                                                                                                                                          |                                                                                          |
| MAGIC 2021<br>(PMID<br>34059833) | 200622 | European-<br>ancestry<br>individuals<br>without diabetes                      | mmol/L, obtained from whole blood, corrected<br>to plasma levels using a correction factor 1.13                                          | Age, sex, age square, BMI, genetic<br>principle components, study-specific<br>covariates |
| <b>FI, pmol/L</b>                |        |                                                                               |                                                                                                                                          |                                                                                          |
| MAGIC 2021<br>(PMID<br>34059833) | 151013 | European-<br>ancestry<br>individuals<br>without diabetes                      | pmol/L, obtained from whole blood, corrected<br>to plasma levels using a correction factor 1.13.<br>Natural log-transformed in analysis. | Age, sex, age square, BMI, genetic<br>principle components, study-specific<br>covariates |
| <b>OGTT,<br/>mmol/L</b>          |        |                                                                               |                                                                                                                                          |                                                                                          |
| MAGIC 2021<br>(PMID<br>34059833) | 63396  | European-<br>ancestry<br>individuals<br>without diabetes                      | mmol/L, obtained 2 hours after a glucose<br>challenge using an oral glucose-tolerance test                                               | Age, sex, age square, BMI, genetic<br>principle components, study-specific<br>covariates |
| <b>HbA1c, %</b>                  |        |                                                                               |                                                                                                                                          |                                                                                          |
| MAGIC 2021<br>(PMID<br>34059833) | 146806 | European-<br>ancestry<br>individuals<br>without diabetes                      | As percentage                                                                                                                            | Age, sex, age square, genetic principle<br>components, study-specific covariates         |
| <b>SBP, mmHg</b>                 |        |                                                                               |                                                                                                                                          |                                                                                          |



|                                 |        |                                      |                                                                             |                                                                                          |
|---------------------------------|--------|--------------------------------------|-----------------------------------------------------------------------------|------------------------------------------------------------------------------------------|
| ICBP 2017<br>(PMID<br>28739976) | 150134 | European-<br>ancestry<br>individuals | 15 mmHg added to the raw SBP value for<br>antihypertensive medication users | Age, sex, age square, BMI, genetic<br>principle components, study-specific<br>covariates |
| <b>DBP, mmHg</b>                |        |                                      |                                                                             |                                                                                          |
| ICBP 2017<br>(PMID<br>28739976) | 150134 | European-<br>ancestry<br>individuals | 10 mmHg added to the raw SBP value for<br>antihypertensive medication users | Age, sex, age square, BMI, genetic<br>principle components, study-specific<br>covariates |
| <b>PP, mmHg</b>                 |        |                                      |                                                                             |                                                                                          |
| ICBP 2017<br>(PMID<br>28739976) | 150134 | European-<br>ancestry<br>individuals | Difference between SBP and DBP                                              | Age, sex, age square, BMI, genetic<br>principle components, study-specific<br>covariates |

---

\*: case number/control number.

§: the HERMES consortium has 40% sample overlap with UK Biobank.

#: the Nielson 2018 study has 38% sample overlap with UK Biobank.

TC: total cholesterol. TG: triglyceride. HDL: high density lipoprotein. LDL: low density lipoprotein. BMI: body mass index. OGTT: 2-hour glucose after oral glucose tolerance test. FG: fasting glucose. FI: fasting insulin. HbA1c: glycated haemoglobin. SBP: systolic blood pressure. DBP: diastolic blood pressure. PP: pulse pressure. GLGC: Global Lipids Genetics Consortium. MAGIC: the Meta-Analyses of Glucose and Insulin-related traits Consortium. ICBP: International Consortium for Blood Pressure.

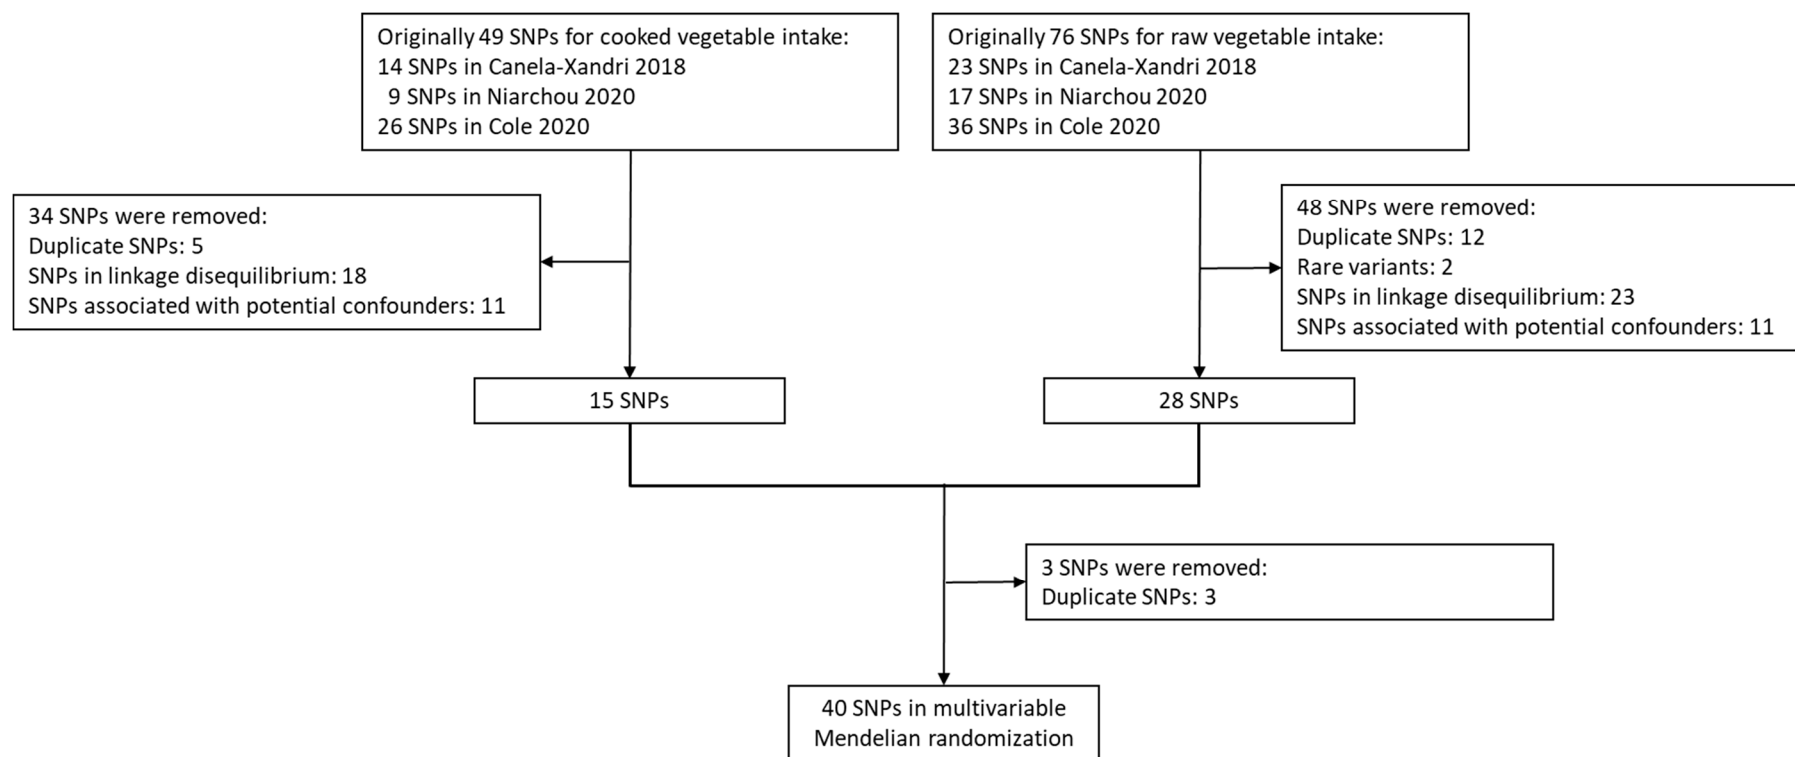

Supplementary figure S1: The process of SNP selection for cooked and raw vegetable intake.

Criteria for linkage disequilibrium:  $r^2$  0.001 and distance 10 000 kb.

Potential confounders: blood pressure, smoking, drinking, and adiposity (body weight, body mass index, body fat mass, body fat percentage, waist circumference, hip circumference, waist-to-hip ratio). The associated phenotypes for each SNP was searched in Phenoscanner v2 database (<http://www.phenoscanner.medschl.cam.ac.uk/>) at genome-wide significance level ( $p < 5 * 10^{-8}$ ). SNP: single nucleotide polymorphism.

Supplementary table S2: Biological functions of the SNPs associated with cooked and raw vegetable intake.

| SNPs                           | Chromosome | Position  | Effect allele | Other allele | Effect allele frequency | Nearest gene | Relevant functions                     | Enrichment in gastrointestinal tract organs and glands |
|--------------------------------|------------|-----------|---------------|--------------|-------------------------|--------------|----------------------------------------|--------------------------------------------------------|
| <b>Cooked vegetable intake</b> |            |           |               |              |                         |              |                                        |                                                        |
| rs1534749                      | 1          | 190028576 | C             | T            | 0.470                   | BRINP3       | Unclear                                | No                                                     |
| rs3001363                      | 1          | 154125067 | T             | C            | 0.489                   | NUP210L      | Unclear                                | Yes                                                    |
| rs113993820                    | 2          | 102766634 | T             | G            | 0.019                   | IL1R1        | Unclear                                | Yes                                                    |
| rs2102738                      | 2          | 172525884 | C             | A            | 0.172                   | DYNC1I2      | Unclear                                | Yes                                                    |
| rs442291                       | 2          | 79676305  | C             | T            | 0.389                   | CTNNA2       | Unclear                                | No                                                     |
| rs17653477                     | 3          | 71170319  | G             | A            | 0.031                   | FOXP1        | Unclear                                | Yes                                                    |
| rs10020708                     | 4          | 178097496 | A             | C            | 0.494                   | NEIL3        | Unclear                                | Yes                                                    |
| rs17714824                     | 5          | 158254070 | T             | G            | 0.175                   | EBF1, FABP6  | lipid metabolism                       | Yes                                                    |
| rs33947258                     | 5          | 141194870 | A             | C            | 0.261                   | PCDH1        | lipid metabolism                       | Yes                                                    |
| rs12190945                     | 6          | 84162042  | G             | A            | 0.296                   | ME1          | lipid metabolism                       | Yes                                                    |
| rs6975898                      | 7          | 4540687   | G             | T            | 0.376                   | FOXK1        | protein metabolism, glucose metabolism | Yes                                                    |
| rs11995369                     | 8          | 89649177  | C             | T            | 0.202                   | MMP16        | Unclear                                | Yes                                                    |
| rs10156602                     | 9          | 96345328  | G             | A            | 0.362                   | PHF2         | bone/tooth health                      | Yes                                                    |
| rs10161952                     | 13         | 59474383  | C             | A            | 0.313                   | DIAPH3       | Unclear                                | No                                                     |
| rs6420335                      | 13         | 69556727  | G             | C            | 0.467                   | KLHL1        | Unclear                                | No                                                     |
| <b>Raw vegetable intake</b>    |            |           |               |              |                         |              |                                        |                                                        |
| rs11209780                     | 1          | 71876652  | A             | G            | 0.216                   | NEGR1        | protein metabolism                     | Yes                                                    |
| rs3001363                      | 1          | 154125067 | T             | C            | 0.489                   | NUP210L      | Unclear                                | Yes                                                    |
| rs3828120                      | 1          | 82434387  | A             | T            | 0.328                   | ADGRL2       | Unclear                                | No                                                     |
| rs11125813                     | 2          | 59991047  | A             | G            | 0.219                   | BCL11A       | Unclear                                | No                                                     |
| rs4281874                      | 2          | 176451226 | T             | C            | 0.265                   | LNPK         | Unclear                                | No                                                     |
| rs442291                       | 2          | 79676305  | C             | T            | 0.389                   | CTNNA2       | Unclear                                | No                                                     |
| rs78940216                     | 2          | 27153318  | A             | G            | 0.111                   | DPYSL5       | lipid metabolism                       | Yes                                                    |
| rs12630752                     | 3          | 44303185  | G             | A            | 0.234                   | TOPAZ1       | Unclear                                | Yes                                                    |
| rs17075255                     | 5          | 164759108 | T             | C            | 0.234                   | MAT2B        | lipid metabolism                       | No                                                     |

|            |    |           |   |   |       |         |                                                 |     |
|------------|----|-----------|---|---|-------|---------|-------------------------------------------------|-----|
| rs2915858  | 5  | 166542621 | G | A | 0.432 | TENM2   |                                                 | Yes |
| rs62380935 | 5  | 137723585 | G | A | 0.215 | KDM3B   | Unclear                                         | Yes |
| rs9359954  | 6  | 92318594  | G | T | 0.479 | MAP3K7  | Unclear                                         | No  |
| rs57221424 | 7  | 35215670  | G | C | 0.322 | DPY19L2 | glucose metabolism,<br>protein metabolism       | Yes |
| rs6958768  | 7  | 77773693  | C | A | 0.167 | MAGI2   | Unclear                                         | Yes |
| rs13255011 | 8  | 35051793  | T | C | 0.479 | UNC5D   | Unclear                                         | Yes |
| rs13267577 | 8  | 4847469   | T | C | 0.381 | CSMD1   | Unclear                                         | No  |
| rs1520919  | 8  | 64696606  | A | G | 0.299 | YTHDF3  | Unclear                                         | Yes |
| rs687135   | 9  | 37257202  | T | C | 0.454 | ZCCHC7  | Unclear                                         | Yes |
| rs7857380  | 9  | 128555022 | C | A | 0.365 | PBX3    | Unclear                                         | Yes |
| rs67497633 | 10 | 103815495 | A | G | 0.169 | ARMH3   | Crohn's disease                                 | Yes |
| rs11608727 | 12 | 110060984 | G | T | 0.196 | MVK     | gastrointestinal<br>dismay,<br>lipid metabolism | No  |
| rs10161952 | 13 | 59474383  | C | A | 0.313 | DIAPH3  | Unclear                                         | No  |
| rs77797947 | 13 | 56160164  | A | C | 0.033 | PRR20A  | Unclear                                         | No  |
| rs9323534  | 14 | 20586432  | T | C | 0.433 | OR4K17  | olfactory receptor                              | No  |
| rs1437761  | 15 | 97010698  | C | T | 0.249 | NR2F2   | Unclear                                         | Yes |
| rs956362   | 15 | 35927655  | G | A | 0.212 | DPH6    | Unclear                                         | Yes |
| rs2447090  | 17 | 2298974   | G | A | 0.361 | MNT     | Unclear                                         | Yes |
| rs6079589  | 20 | 14850762  | T | C | 0.218 | MACROD2 | protein metabolism                              | No  |

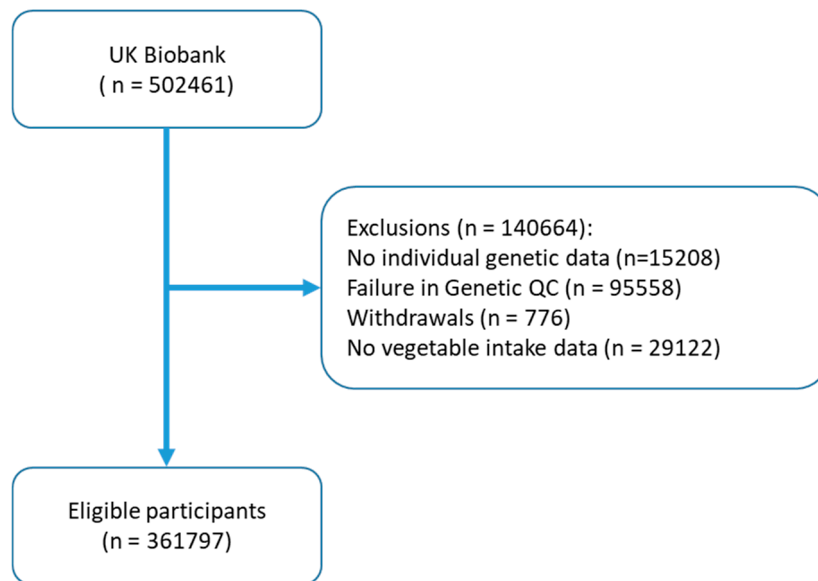

Supplementary figure S2: Flowchart of participant selection in UK Biobank for one-sample Mendelian randomization analysis.

Genetic QC: genetic quality control, in which we excluded participants if (1) the reported sex was different from their genetic sex, (2) the sex chromosome karyotypes are putatively different from XX or XY, (3) outliers in heterozygosity and missing rates, indicating the sample genotypes are of poor quality, (4) non-Caucasian genetic ethnicity, (5) genetic relatedness with other participants in UK Biobank.

Supplementary table S3: The ICD9 and ICD10 codes to confirm the cardiovascular outcomes in UK Biobank.

| Cardiovascular outcomes | ICD 9 codes        | ICD 10 codes             |
|-------------------------|--------------------|--------------------------|
| Coronary heart disease  | 410-414, 798       | I21-I25                  |
| Stroke                  | 430, 431, 434, 436 | I60, I61, I63, I64       |
| Ischaemic stroke        | 434, 436           | I63, I64                 |
| Heart failure           | 4029, 428          | I50, I11.0, I13.0, I13.2 |
| Atrial fibrillation     | 4273               | I48                      |

Supplementary table S4: Characteristics of the included SNPs included in two-sample multivariable Mendelian randomization.

| SNP        | Ch<br>r | Position | E<br>A | OA | EAF  | Gene        | Phenotype<br>* | Cooked vegetable intake |       |          |       | Raw vegetable intake |       |        |       |
|------------|---------|----------|--------|----|------|-------------|----------------|-------------------------|-------|----------|-------|----------------------|-------|--------|-------|
|            |         |          |        |    |      |             |                | beta                    | se    | p        | F     | beta                 | se    | p      | F     |
| rs10020708 | 4       | 17809749 | C      | A  | 0.50 | --          | cooked         | 0.015                   | 0.003 | 2.52E-06 | 22.15 | 0.004                | 0.004 | 2.93E- | 1.104 |
|            |         | 6        |        |    | 6    |             |                |                         |       |          | 6     |                      |       | 01     |       |
| rs10156602 | 9       | 96345328 | G      | A  | 0.36 | PHF2        | cooked         | 0.020                   | 0.003 | 4.66E-09 | 34.32 | 0.011                | 0.004 | 7.70E- | 7.103 |
|            |         |          |        |    | 2    |             |                |                         |       |          | 9     |                      |       | 03     |       |
| rs10161952 | 13      | 59474383 | A      | C  | 0.68 | --          | raw            | 0.017                   | 0.004 | 2.60E-06 | 22.09 | 0.021                | 0.004 | 1.95E- | 27.08 |
|            |         |          |        |    | 7    |             |                |                         |       |          | 3     |                      |       | 07     |       |
| rs11125813 | 2       | 59991047 | A      | G  | 0.21 | --          | raw            | 0.008                   | 0.004 | 3.55E-02 |       | 0.023                | 0.005 | 7.26E- | 24.54 |
|            |         |          |        |    | 9    |             |                |                         |       |          | 4.423 |                      |       | 07     |       |
| rs11209780 | 1       | 71876652 | G      | A  | 0.78 | NEGR1       | raw            | 0.002                   | 0.004 | 6.58E-01 |       | 0.025                | 0.005 | 1.33E- | 27.82 |
|            |         |          |        |    | 4    |             |                |                         |       |          | 0.196 |                      |       | 07     |       |
| rs11399382 | 2       | 10276663 | G      | T  | 0.98 | IL1R1       | cooked         | 0.061                   | 0.012 | 3.53E-07 | 25.93 | 0.041                | 0.014 | 3.30E- | 8.634 |
|            |         |          |        |    | 1    |             |                |                         |       |          | 9     |                      |       | 03     |       |
| rs11608727 | 12      | 11006098 | T      | G  | 0.80 | --          | raw            | 0.015                   | 0.004 | 2.29E-04 | 13.58 | 0.026                | 0.005 | 6.77E- | 29.13 |
|            |         | 4        |        |    | 4    |             |                |                         |       |          | 1     |                      |       | 08     |       |
| rs11995369 | 8       | 89649177 | C      | T  | 0.20 | LOC10537563 | cooked         | 0.023                   | 0.004 | 2.40E-08 | 31.14 | 0.003                | 0.005 | 4.72E- | 0.518 |
|            |         |          |        |    | 2    |             |                |                         |       |          | 2     |                      |       | 01     |       |
| rs12190945 | 6       | 84162042 | A      | G  | 0.70 | --          | cooked         | 0.015                   | 0.004 | 2.46E-05 | 17.79 | 0.002                | 0.004 | 6.09E- | 0.262 |
|            |         |          |        |    | 4    |             |                |                         |       |          | 1     |                      |       | 01     |       |
| rs12630752 | 3       | 44303185 | A      | G  | 0.76 | TOPAZ1      | raw            | 0.012                   | 0.004 | 1.84E-03 |       | 0.023                | 0.005 | 3.73E- | 25.82 |
|            |         |          |        |    | 6    |             |                |                         |       |          | 9.706 |                      |       | 07     |       |
| rs13255011 | 8       | 35051793 | T      | C  | 0.47 | --          | raw            | 0.013                   | 0.003 | 7.64E-05 | 15.64 | 0.021                | 0.004 | 6.54E- | 29.19 |
|            |         |          |        |    | 9    |             |                |                         |       |          | 6     |                      |       | 08     |       |
| rs13267577 | 8       | 4847469  | C      | T  | 0.61 | CSMD1       | raw            | 0.007                   | 0.003 | 3.38E-02 |       | 0.024                | 0.004 | 1.05E- | 37.23 |
|            |         |          |        |    | 9    |             |                |                         |       |          | 4.506 |                      |       | 09     |       |
| rs1437761  | 15      | 97010698 | T      | C  | 0.75 | --          | raw            | 0.011                   | 0.004 | 4.20E-03 |       | 0.023                | 0.004 | 1.13E- | 28.13 |
|            |         |          |        |    | 1    |             |                |                         |       |          | 8.193 |                      |       | 07     |       |
| rs1520919  | 8       | 64696606 | G      | A  | 0.70 | LINC01289   | raw            | 0.011                   | 0.004 | 2.72E-03 |       | 0.026                | 0.004 | 7.55E- | 37.87 |
|            |         |          |        |    | 1    |             |                |                         |       |          | 8.986 |                      |       | 10     |       |

|            |    |          |   |   |   |      |             |         |       |       |          |       |       |       |        |       |
|------------|----|----------|---|---|---|------|-------------|---------|-------|-------|----------|-------|-------|-------|--------|-------|
| rs1534749  | 1  | 19002857 | 6 | T | C | 0.53 | --          |         |       |       |          | 26.89 |       |       | 6.54E- |       |
|            |    |          |   |   |   | 0    |             | cooked  | 0.017 | 0.003 | 2.15E-07 | 5     | 0.010 | 0.004 | 03     | 7.396 |
|            |    | 16475910 |   |   |   | 0.76 | --          |         |       |       |          |       |       |       | 6.98E- | 38.02 |
| rs17075255 | 5  |          | 8 | C | T | 6    |             | raw     | 0.001 | 0.004 | 7.72E-01 | 0.084 | 0.028 | 0.005 | 10     | 7     |
|            |    |          |   |   |   | 0.96 | FOXP1       |         |       |       |          | 23.41 | -     |       | 7.16E- |       |
| rs17653477 | 3  | 71170319 | A | G |   | 9    |             | cooked  | 0.046 | 0.009 | 1.31E-06 | 5     | 0.004 | 0.011 | 01     | 0.132 |
|            |    | 15825407 |   |   |   | 0.17 | EBF1        |         |       |       |          | 32.24 |       |       | 4.64E- | 12.25 |
| rs17714824 | 5  |          | 0 | T | G | 5    |             | cooked  | 0.024 | 0.004 | 1.36E-08 | 5     | 0.018 | 0.005 | 04     | 4     |
|            |    | 17252588 |   |   |   | 0.82 | --          |         |       |       |          | 28.09 |       |       | 2.84E- |       |
| rs2102738  | 2  |          | 4 | A | C | 8    |             | cooked  | 0.023 | 0.004 | 1.15E-07 | 8     | 0.015 | 0.005 | 03     | 8.911 |
|            |    |          |   |   |   | 0.63 | MNT         |         |       |       |          |       |       |       | 4.81E- | 20.91 |
| rs2447090  | 17 | 2298974  | A | G |   | 9    |             | raw     | 0.008 | 0.003 | 1.96E-02 | 5.451 | 0.018 | 0.004 | 06     | 1     |
|            |    | 16654262 |   |   |   | 0.43 | TENM2       |         |       |       |          | 20.06 |       |       | 8.80E- | 33.09 |
| rs2915858  | 5  |          | 1 | G | A | 2    |             | raw     | 0.015 | 0.003 | 7.48E-06 | 7     | 0.022 | 0.004 | 09     | 2     |
|            |    | 15412506 |   |   |   | 0.51 | NUP210L     | cooked, |       |       |          | 30.92 |       |       | 9.01E- | 42.02 |
| rs3001363  | 1  |          | 7 | C | T | 1    |             | raw     | 0.018 | 0.003 | 2.68E-08 | 9     | 0.025 | 0.004 | 11     | 8     |
|            |    | 14119487 |   |   |   | 0.26 | LOC10798645 |         |       |       |          | 38.67 |       |       | 1.22E- |       |
| rs33947258 | 5  |          | 0 | A | C | 1    | 4           | cooked  | 0.023 | 0.004 | 5.01E-10 | 3     | 0.007 | 0.004 | 01     | 2.397 |
|            |    |          |   |   |   | 0.32 | ADGRL2      |         |       |       |          |       |       |       | 1.20E- | 32.49 |
| rs3828120  | 1  | 82434387 | A | T |   | 8    |             | raw     | 0.009 | 0.003 | 6.58E-03 | 7.384 | 0.023 | 0.004 | 08     | 4     |
|            |    | 17645122 |   |   |   | 0.26 | --          |         |       |       |          |       |       |       | 1.14E- | 28.12 |
| rs4281874  | 2  |          | 6 | T | C | 5    |             | raw     | 0.002 | 0.004 | 5.69E-01 | 0.325 | 0.023 | 0.004 | 07     | 7     |
|            |    |          |   |   |   | 0.38 | --          | cooked, |       |       |          | 48.11 |       |       | 2.49E- | 35.54 |
| rs442291   | 2  | 79676305 | C | T |   | 9    |             | raw     | 0.023 | 0.003 | 4.03E-12 | 3     | 0.023 | 0.004 | 09     | 9     |
|            |    |          |   |   |   | 0.32 | DPY19L2P1   |         |       |       |          |       |       |       | 3.28E- | 35.01 |
| rs57221424 | 7  | 35215670 | G | C |   | 2    |             | raw     | 0.008 | 0.004 | 1.73E-02 | 5.668 | 0.024 | 0.004 | 09     | 1     |
|            |    |          |   |   |   | 0.78 | MACROD2     |         |       |       |          |       |       |       | 3.09E- | 30.65 |
| rs6079589  | 20 | 14850762 | C | T |   | 2    |             | raw     | 0.005 | 0.004 | 1.66E-01 | 1.919 | 0.025 | 0.005 | 08     | 2     |
|            |    | 13772358 |   |   |   | 0.21 | KDM3B       |         |       |       |          |       |       |       | 3.44E- | 30.44 |
| rs62380935 | 5  |          | 5 | G | A | 5    |             | raw     | 0.009 | 0.004 | 2.08E-02 | 5.341 | 0.026 | 0.005 | 08     | 2     |
|            |    |          |   |   |   | 0.53 | --          |         |       |       |          | 30.66 |       |       | 4.01E- | 21.26 |
| rs6420335  | 13 | 69556727 | C | G |   | 3    |             | cooked  | 0.018 | 0.003 | 3.07E-08 | 5     | 0.018 | 0.004 | 06     | 2     |



|            |    |          |   |   |   |      |         |         |       |       |          |       |       |       |          |       |
|------------|----|----------|---|---|---|------|---------|---------|-------|-------|----------|-------|-------|-------|----------|-------|
| rs67497633 | 10 | 10381549 | 5 | A | G | 0.16 | ARMH3   | raw     | 0.005 | 0.004 | 2.70E-01 | 1.217 | 0.029 | 0.005 | 1.69E-08 | 31.82 |
|            |    |          |   |   |   | 9    |         |         |       |       |          |       |       |       |          | 7     |
|            |    |          |   |   |   | 0.54 | ZCCHC7  | raw     | 0.013 | 0.003 | 9.26E-05 | 15.28 | 0.021 | 0.004 | 3.55E-08 | 30.38 |
| rs687135   | 9  | 37257202 | C | T |   | 6    |         | raw     | 0.019 | 0.004 | 1.70E-05 | 18.50 | 0.026 | 0.005 | 6.78E-07 | 24.67 |
| rs6958768  | 7  | 77773693 | A | C |   | 3    | MAGI2   | raw     | 0.017 | 0.003 | 5.61E-07 | 25.04 | 0.006 | 0.004 | 1.59E-01 | 1.984 |
| rs6975898  | 7  | 4540687  | T | G |   | 4    | --      | cooked  | 0.002 | 0.010 | 8.12E-01 | 0.057 | 0.051 | 0.012 | 9.28E-06 | 19.65 |
| rs77797947 | 13 | 56160164 | A | C |   | 3    |         | raw     | 0.013 | 0.003 | 7.07E-05 | 10.19 | 0.027 | 0.004 | 9.70E-11 | 23.98 |
|            |    | 12855502 |   |   |   | 0.63 | PBX3    | cooked, | 0.017 | 0.005 | 1.41E-03 | 5     | 0.030 | 0.006 | 2.00E-07 | 31.49 |
| rs7857380  | 9  | 2        | A | C |   | 5    |         | raw     | 0.008 | 0.003 | 2.16E-02 | 5.277 | 0.022 | 0.004 | 5.93E-08 | 20.50 |
|            |    |          |   |   |   | 0.88 | DPYSL5  | raw     | 0.007 | 0.003 | 2.37E-02 | 5.118 | 0.017 | 0.004 | 2.40E-06 | 17.84 |
| rs78940216 | 2  | 27153318 | G | A |   | 9    |         | raw     | 0.012 | 0.004 | 2.30E-03 | 9.294 | 0.020 | 0.005 | 05       | 1     |
| rs9323534  | 14 | 20586432 | C | T |   | 7    | OR4K17  | raw     |       |       |          |       |       |       |          |       |
|            |    |          |   |   |   | 0.47 | --      | raw     |       |       |          |       |       |       |          |       |
| rs9359954  | 6  | 92318594 | G | T |   | 9    |         | raw     |       |       |          |       |       |       |          |       |
|            |    |          |   |   |   | 0.21 | DPH6-DT | raw     |       |       |          |       |       |       |          |       |
| rs956362   | 15 | 35927655 | G | A |   | 2    |         | raw     |       |       |          |       |       |       |          |       |

The associations between the SNPs and vegetable intake were obtained from the Canela-Xandri 2018 study. SNP: single nucleotide polymorphism. Chr: chromosome. EA: effect allele. OA: other allele. EAF: effect allele frequency.

Supplementary table S5: Baseline characteristics of the UK Biobank participants included in one-sample Mendelian randomization.

|                                             | Men<br>(n = 162841) | Women<br>(n = 198956) | Total<br>(n = 361797) |
|---------------------------------------------|---------------------|-----------------------|-----------------------|
| Age, years                                  | 57.21 (8.07)        | 56.73 (7.90)          | 56.94 (7.98)          |
| Cooked vegetable intake,<br>tablespoons/day | 2.76 (1.90)         | 2.72 (1.65)           | 2.74 (1.77)           |
| Cooked vegetable intake GRS                 | 1.10 (0.16)         | 1.10 (0.16)           | 1.10 (0.16)           |
| Raw vegetable intake,<br>tablespoons/day    | 1.97 (1.94)         | 2.36 (1.98)           | 2.19 (1.98)           |
| Raw vegetable intake GRS                    | 1.06 (0.12)         | 1.06 (0.12)           | 1.06 (0.12)           |
| Body mass index, kg/m <sup>2</sup>          | 27.84 (4.21)        | 27.01 (5.10)          | 27.38 (4.74)          |
| Systolic blood pressure, mmHg               | 143.28 (18.49)      | 137.66 (20.23)        | 140.20 (19.66)        |
| Diastolic blood pressure, mmHg              | 84.12 (10.53)       | 80.67 (10.50)         | 82.23 (10.65)         |
| Red meat intake, times/week                 | 2.27 (1.46)         | 1.99 (1.33)           | 2.12 (1.40)           |
| Processed meat intake, times/week           |                     |                       |                       |
| < 1                                         | 7600 (4.67)         | 22843 (11.49)         | 30443 (8.42)          |
| 1                                           | 83468 (51.3)        | 134333 (67.58)        | 217801 (60.25)        |
| ≥ 2                                         | 71645 (44.03)       | 41595 (20.93)         | 113240 (31.33)        |
| Oily fish intake, times/week                |                     |                       |                       |
| < 1                                         | 72503 (44.7)        | 82387 (41.53)         | 154890 (42.96)        |
| 1                                           | 60753 (37.46)       | 79211 (39.93)         | 139964 (38.82)        |
| ≥ 2                                         | 28943 (17.84)       | 36771 (18.54)         | 65714 (18.23)         |
| Physical activity level                     |                     |                       |                       |
| Low                                         | 25504 (18.22)       | 28244 (18.04)         | 53748 (18.13)         |
| Moderate                                    | 53778 (38.42)       | 67284 (42.98)         | 121062 (40.83)        |
| High                                        | 60705 (43.36)       | 61022 (38.98)         | 121727 (41.05)        |
| Drinking status                             |                     |                       |                       |
| Never drinker                               | 2649 (1.63)         | 8497 (4.27)           | 11146 (3.08)          |
| Previous drinker                            | 5125 (3.15)         | 7043 (3.54)           | 12168 (3.37)          |
| Current drinker                             | 154965 (95.22)      | 183273 (92.18)        | 338238 (93.55)        |
| Smoking status                              |                     |                       |                       |
| Never smoker                                | 79199 (48.8)        | 118132 (59.57)        | 197331 (54.72)        |
| Previous smoker                             | 64571 (39.79)       | 63850 (32.2)          | 128421 (35.61)        |
| Current smoker                              | 18525 (11.41)       | 16336 (8.24)          | 34861 (9.67)          |

GRS: genetic risk score. Physical activity level was measured by the International Physical Activity Questionnaire.

Cooked vegetable intake GRS

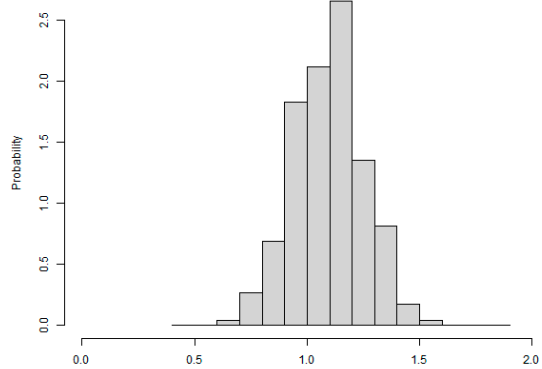

Raw vegetable intake GRS

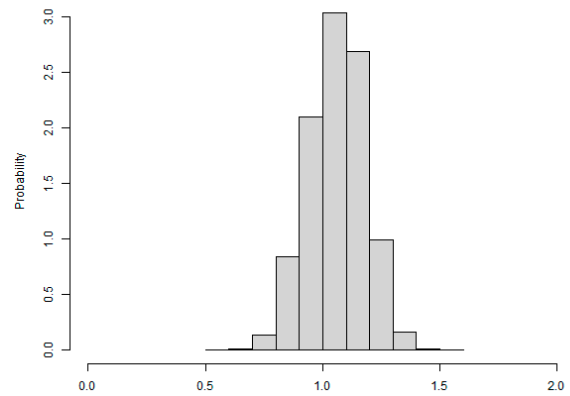

Supplementary figure S3: Histograms for the distribution of vegetable intake genetic risk scores (GRS).

Supplementary table S6: Associations (showing p values) between vegetable intake genetic risk scores and baseline characteristics in UK Biobank

|                          | Cooked vegetable intake GRS  | Raw vegetable intake GRS     |
|--------------------------|------------------------------|------------------------------|
| Age                      | 0.152                        | 0.660                        |
| Sex                      | 0.394                        | 0.008                        |
| Body mass index          | 0.188                        | 0.103                        |
| Physical activity level  | 0.014                        | 0.044                        |
| Drinking status          | 0.271                        | 0.004                        |
| Smoking status           | 0.099                        | 0.002                        |
| Systolic blood pressure  | 0.578                        | 0.147                        |
| Diastolic blood pressure | 0.081                        | 0.111                        |
| Red meat intake          | 0.152                        | 0.470                        |
| Processed meat intake    | 0.861                        | 0.202                        |
| Oily fish intake         | 0.0004 #                     | 1.44 * 10 <sup>-11</sup> #   |
| Fruit intake             | 3.40 * 10 <sup>-5</sup> #    | 0.0002 #                     |
| Cooked vegetable intake  | < 2.00 * 10 <sup>-16</sup> # | 1.86 * 10 <sup>-15</sup> #   |
| Raw vegetable intake     | 2.96 * 10 <sup>-6</sup> #    | < 2.00 * 10 <sup>-16</sup> # |

The table shows the p value for the overall fitting of the linear models of each baseline characteristic on vegetable intake GRS (genetic risk score).

#: association significant under Bonferroni correction (to control multiple comparison:  $p = 0.05/28 = 0.0017$ ).

Supplementary table S7: Associations between vegetable intake and cardiovascular risk in multivariable one-sample Mendelian randomization in UK Biobank.

|                               |         |         | Cooked vegetable |                   | Raw vegetable |                   |
|-------------------------------|---------|---------|------------------|-------------------|---------------|-------------------|
|                               | Total n | Event n | F statistics     | OR (95% CI)       | F statistics  | OR (95% CI)       |
| <b>Primary analysis</b>       |         |         |                  |                   |               |                   |
| Coronary heart disease        | 361797  | 37014   | 68.67            | 1.23 (0.69, 2.21) | 288.74        | 0.80 (0.59, 1.08) |
| Stroke                        | 361797  | 9298    | 70.17            | 0.54 (0.18, 1.63) | 319.57        | 1.15 (0.66, 2.00) |
| Ischaemic stroke              | 361797  | 7264    | 70.27            | 0.70 (0.20, 2.44) | 322.39        | 0.99 (0.53, 1.87) |
| Heart failure                 | 361797  | 11773   | 68.03            | 0.82 (0.29, 2.26) | 321.19        | 0.90 (0.53, 1.52) |
| Atrial fibrillation           | 361797  | 25915   | 62.42            | 0.80 (0.37, 1.70) | 318.80        | 0.90 (0.61, 1.32) |
| <b>Sensitivity analysis 1</b> |         |         |                  |                   |               |                   |
| Coronary heart disease        | 340615  | 21819   | 68.67            | 1.44 (0.73, 2.82) | 288.74        | 0.80 (0.56, 1.14) |
| Stroke                        | 345189  | 6425    | 70.17            | 0.67 (0.19, 2.38) | 319.57        | 0.97 (0.50, 1.90) |
| Ischaemic stroke              | 345562  | 5082    | 70.27            | 1.05 (0.25, 4.46) | 322.39        | 0.80 (0.38, 1.71) |
| Heart failure                 | 344735  | 8243    | 68.03            | 0.90 (0.28, 2.85) | 321.19        | 0.80 (0.44, 1.46) |
| Atrial fibrillation           | 342070  | 18624   | 62.42            | 0.77 (0.35, 1.71) | 318.80        | 0.98 (0.65, 1.50) |
| <b>Sensitivity analysis 2</b> |         |         |                  |                   |               |                   |
| Coronary heart disease        | 361797  | 37014   | 68.67            | 1.25 (0.69, 2.23) | 288.74        | 0.80 (0.59, 1.08) |
| Stroke                        | 361797  | 9298    | 70.17            | 0.56 (0.18, 1.67) | 319.57        | 1.15 (0.66, 2.01) |
| Ischaemic stroke              | 361797  | 7264    | 70.27            | 0.71 (0.20, 2.51) | 322.39        | 1.00 (0.53, 1.88) |
| Heart failure                 | 361797  | 11773   | 68.03            | 0.82 (0.30, 2.28) | 321.19        | 0.91 (0.54, 1.53) |
| Atrial fibrillation           | 361797  | 25915   | 62.42            | 0.79 (0.37, 1.70) | 318.80        | 0.89 (0.61, 1.31) |
| <b>Sensitivity analysis 3</b> |         |         |                  |                   |               |                   |
| Coronary heart disease        | 340615  | 21819   | 68.67            | 1.65 (0.86, 3.16) | 288.74        | 0.76 (0.54, 1.07) |
| Stroke                        | 345189  | 6425    | 70.17            | 0.73 (0.22, 2.46) | 319.57        | 1.07 (0.58, 1.98) |

|                     |        |       |       |                      |        |                      |
|---------------------|--------|-------|-------|----------------------|--------|----------------------|
| Ischaemic stroke    | 345562 | 5082  | 70.27 | 1.00 (0.25,<br>3.92) | 322.39 | 0.91 (0.46,<br>1.82) |
| Heart failure       | 344735 | 8243  | 68.03 | 0.86 (0.30,<br>2.50) | 321.19 | 0.84 (0.49,<br>1.46) |
| Atrial fibrillation | 342070 | 18624 | 62.42 | 0.76 (0.35,<br>1.68) | 318.80 | 0.98 (0.66,<br>1.46) |

Primary analysis: The one-sample MR two-stage least squares estimates were obtained using logistic regression to estimate the association between the genetic risk score and the health outcomes.

Sensitivity analysis 1: The one-sample MR two-stage least squares estimates were obtained using cox regression to estimate the association between the genetic risk score and the health outcomes, after excluding participants with baseline cardiovascular diseases.

Sensitivity analysis 2: The one-sample MR two-stage least squares estimates were obtained using logistic regression to estimate the association between the genetic risk score and the health outcomes, with additional adjustment for potential residual confounder (oily fish and fruit intake).

Sensitivity analysis 3: The one-sample MR two-stage least squares estimates were obtained using cox regression to estimate the association between the genetic risk score and the health outcomes, after excluding participants with baseline cardiovascular diseases, with additional adjustment for potential residual confounder (oily fish and fruit intake).

Supplementary table S8: Associations between vegetable intake and cardiovascular risk in univariable one-sample Mendelian randomization in UK Biobank.

| Invariable One-sample Mendelian randomization in UK Biobank. |         |         |                  |                   |               |                   |
|--------------------------------------------------------------|---------|---------|------------------|-------------------|---------------|-------------------|
|                                                              | Total n | Event n | Cooked vegetable |                   | Raw vegetable |                   |
|                                                              |         |         | F statistics     | OR (95% CI)       | F statistics  | OR (95% CI)       |
| <b>Primary analysis</b>                                      |         |         |                  |                   |               |                   |
| Coronary heart disease                                       | 361797  | 37014   | 68.67            | 1.09 (0.68, 1.74) | 288.74        | 0.87 (0.71, 1.06) |
| Stroke                                                       | 361797  | 9298    | 70.17            | 0.59 (0.24, 1.43) | 319.57        | 0.92 (0.64, 1.32) |
| Ischaemic stroke                                             | 361797  | 7264    | 70.27            | 0.69 (0.25, 1.91) | 322.39        | 0.87 (0.58, 1.31) |
| Heart failure                                                | 361797  | 11773   | 68.03            | 0.77 (0.34, 1.75) | 321.19        | 0.83 (0.60, 1.15) |
| Atrial fibrillation                                          | 361797  | 25915   | 62.42            | 0.74 (0.42, 1.33) | 318.80        | 0.82 (0.66, 1.03) |
| <b>Sensitivity analysis 1</b>                                |         |         |                  |                   |               |                   |
| Coronary heart disease                                       | 340615  | 21819   | 68.67            | 1.27 (0.74, 2.17) | 288.74        | 0.91 (0.72, 1.16) |
| Stroke                                                       | 345189  | 6425    | 70.17            | 0.66 (0.24, 1.83) | 319.57        | 0.83 (0.54, 1.28) |
| Ischaemic stroke                                             | 345562  | 5082    | 70.27            | 0.93 (0.29, 2.95) | 322.39        | 0.82 (0.50, 1.33) |
| Heart failure                                                | 344735  | 8243    | 68.03            | 0.80 (0.32, 2.00) | 321.19        | 0.77 (0.52, 1.12) |
| Atrial fibrillation                                          | 342070  | 18624   | 62.42            | 0.77 (0.42, 1.41) | 318.80        | 0.89 (0.69, 1.14) |
| <b>Sensitivity analysis 2</b>                                |         |         |                  |                   |               |                   |
| Coronary heart disease                                       | 361797  | 37014   | 68.67            | 1.10 (0.69, 1.76) | 288.74        | 0.87 (0.71, 1.06) |
| Stroke                                                       | 361797  | 9298    | 70.17            | 0.60 (0.25, 1.47) | 319.57        | 0.93 (0.65, 1.34) |
| Ischaemic stroke                                             | 361797  | 7264    | 70.27            | 0.71 (0.26, 1.96) | 322.39        | 0.88 (0.58, 1.33) |
| Heart failure                                                | 361797  | 11773   | 68.03            | 0.78 (0.35, 1.77) | 321.19        | 0.84 (0.61, 1.16) |
| Atrial fibrillation                                          | 361797  | 25915   | 62.42            | 0.74 (0.41, 1.32) | 318.80        | 0.81 (0.65, 1.02) |
| <b>Sensitivity analysis 3</b>                                |         |         |                  |                   |               |                   |
| Coronary heart disease                                       | 340615  | 21819   | 68.67            | 1.41 (0.84, 2.38) | 288.74        | 0.91 (0.73, 1.14) |
| Stroke                                                       | 345189  | 6425    | 70.17            | 0.76 (0.28, 2.04) | 319.57        | 0.96 (0.64, 1.43) |
| Ischaemic stroke                                             | 345562  | 5082    | 70.27            | 0.95 (0.31, 2.86) | 322.39        | 0.91 (0.58, 1.43) |

|                     |        |       |       |                      |        |                   |
|---------------------|--------|-------|-------|----------------------|--------|-------------------|
| Heart failure       | 344735 | 8243  | 68.03 | 0.79 (0.34,<br>1.85) | 321.19 | 0.80 (0.57, 1.12) |
| Atrial fibrillation | 342070 | 18624 | 62.42 | 0.75 (0.41,<br>1.38) | 318.80 | 0.88 (0.70, 1.11) |

Primary analysis: The one-sample MR two-stage least squares estimates were obtained using logistic regression to estimate the association between the genetic risk score and the health outcomes.

Sensitivity analysis 1: The one-sample MR two-stage least squares estimates were obtained using cox regression to estimate the association between the genetic risk score and the health outcomes, after excluding participants with baseline cardiovascular diseases.

Sensitivity analysis 2: The one-sample MR two-stage least squares estimates were obtained using logistic regression to estimate the association between the genetic risk score and the health outcomes, with additional adjustment for potential residual confounder (oily fish and fruit intake).

Sensitivity analysis 3: The one-sample MR two-stage least squares estimates were obtained using cox regression to estimate the association between the genetic risk score and the health outcomes, after excluding participants with baseline cardiovascular diseases, with additional adjustment for potential residual confounder (oily fish and fruit intake).



Supplementary table S9: Associations between vegetable intake and cardiovascular risk in univariable two-sample Mendelian randomization.

|                               | No.             | F          | Inverse-variance weighted |      | Weighted median   |      | MR-Egger           |      | p for     |
|-------------------------------|-----------------|------------|---------------------------|------|-------------------|------|--------------------|------|-----------|
|                               | SNP             | statistics | OR (95%CI)                | P    | OR (95%CI)        | P    | OR (95%CI)         | p    | intercept |
| <b>Coronary heart disease</b> |                 |            |                           |      |                   |      |                    |      |           |
| <b>Cooked vegetable</b>       |                 |            |                           |      |                   |      |                    |      |           |
| CARDIoGRAMplusC4D             | 15              | 71.63      | 1.09 (0.80, 1.48)         | 0.58 | 1.41 (0.95, 2.08) | 0.08 | 0.81 (0.23, 2.84)  | 0.75 | 0.64      |
| FinnGen                       | 15              | 71.63      | 1.07 (0.69, 1.68)         | 0.75 | 0.96 (0.55, 1.66) | 0.87 | 0.55 (0.09, 3.40)  | 0.52 | 0.46      |
| <b>Raw vegetable</b>          |                 |            |                           |      |                   |      |                    |      |           |
| CARDIoGRAMplusC4D             | 28              | 101.43     | 0.88 (0.72, 1.08)         | 0.21 | 0.82 (0.64, 1.06) | 0.13 | 0.83 (0.20, 3.40)  | 0.80 | 0.93      |
| FinnGen                       | 27 <sup>#</sup> | 101.62     | 1.06 (0.83, 1.35)         | 0.65 | 1.10 (0.78, 1.57) | 0.58 | 0.78 (0.14, 4.36)  | 0.78 | 0.73      |
| <b>Stroke</b>                 |                 |            |                           |      |                   |      |                    |      |           |
| <b>Cooked vegetable</b>       |                 |            |                           |      |                   |      |                    |      |           |
| MEGASTROKE                    | 15              | 71.63      | 0.99 (0.74, 1.34)         | 0.96 | 0.74 (0.50, 1.07) | 0.11 | 0.63 (0.19, 2.12)  | 0.46 | 0.45      |
| FinnGen                       | 15              | 71.63      | 1.03 (0.62, 1.73)         | 0.90 | 0.85 (0.47, 1.54) | 0.59 | 4.63 (0.66, 32.77) | 0.12 | 0.12      |
| <b>Raw vegetable</b>          |                 |            |                           |      |                   |      |                    |      |           |
| MEGASTROKE                    | 28              | 101.43     | 0.91 (0.77, 1.07)         | 0.25 | 0.91 (0.72, 1.14) | 0.40 | 0.61 (0.20, 1.85)  | 0.38 | 0.47      |
| FinnGen                       | 27 <sup>#</sup> | 101.62     | 0.85 (0.65, 1.12)         | 0.25 | 0.80 (0.55, 1.14) | 0.22 | 0.88 (0.13, 6.17)  | 0.90 | 0.97      |
| <b>Ischaemic stroke</b>       |                 |            |                           |      |                   |      |                    |      |           |
| <b>Cooked vegetable</b>       |                 |            |                           |      |                   |      |                    |      |           |
| MEGASTROKE                    | 15              | 71.63      | 0.96 (0.68, 1.36)         | 0.82 | 0.75 (0.50, 1.14) | 0.18 | 0.38 (0.10, 1.46)  | 0.16 | 0.16      |
| FinnGen                       | 15              | 71.63      | 0.88 (0.51, 1.53)         | 0.65 | 0.86 (0.45, 1.63) | 0.64 | 5.98 (0.81, 44.05) | 0.08 | 0.05*     |
| <b>Raw vegetable</b>          |                 |            |                           |      |                   |      |                    |      |           |
| MEGASTROKE                    | 28              | 101.43     | 0.94 (0.79, 1.13)         | 0.51 | 1.12 (0.87, 1.44) | 0.37 | 0.67 (0.20, 2.24)  | 0.52 | 0.57      |
| FinnGen                       | 27 <sup>#</sup> | 101.62     | 0.82 (0.62, 1.08)         | 0.16 | 0.84 (0.57, 1.24) | 0.38 | 0.90 (0.13, 6.32)  | 0.92 | 0.92      |
| <b>Heart failure</b>          |                 |            |                           |      |                   |      |                    |      |           |
| <b>Cooked vegetable</b>       |                 |            |                           |      |                   |      |                    |      |           |
| HERMES                        | 15              | 71.63      | 1.38 (1.06, 1.80)         | 0.02 | 1.62 (1.15, 2.28) | 0.01 | 1.45 (0.50, 4.16)  | 0.49 | 0.92      |

|                            |                 |        |                   |      |                   |      |                    |      |        |
|----------------------------|-----------------|--------|-------------------|------|-------------------|------|--------------------|------|--------|
| FinnGen                    | 15              | 71.63  | 1.05 (0.75, 1.48) | 0.76 | 1.17 (0.75, 1.83) | 0.49 | 3.56 (0.98, 12.89) | 0.05 | 0.06   |
| <b>Raw vegetable</b>       |                 |        |                   |      |                   |      |                    |      |        |
| HERMES                     | 28              | 101.43 | 1.09 (0.94, 1.27) | 0.25 | 1.10 (0.90, 1.35) | 0.34 | 0.79 (0.29, 2.18)  | 0.65 | 0.53   |
| FinnGen                    | 27 <sup>#</sup> | 101.62 | 1.14 (0.93, 1.40) | 0.21 | 1.26 (0.94, 1.68) | 0.12 | 0.79 (0.19, 3.34)  | 0.75 | 0.61   |
| <b>Atrial fibrillation</b> |                 |        |                   |      |                   |      |                    |      |        |
| <b>Cooked vegetable</b>    |                 |        |                   |      |                   |      |                    |      |        |
| Nielson                    | 15              | 71.63  | 0.98 (0.79, 1.21) | 0.84 | 0.87 (0.67, 1.13) | 0.29 | 0.83 (0.35, 1.97)  | 0.67 | 0.69   |
| FinnGen                    | 15              | 71.63  | 1.22 (0.61, 2.47) | 0.57 | 0.98 (0.51, 1.90) | 0.96 | 4.56 (0.28, 75.65) | 0.29 | 0.34   |
| <b>Raw vegetable</b>       |                 |        |                   |      |                   |      |                    |      |        |
| Nielson 2018               | 28              | 101.43 | 1.03 (0.83, 1.29) | 0.78 | 1.26 (1.02, 1.55) | 0.04 | 0.76 (0.16, 3.54)  | 0.72 | 0.69   |
| FinnGen                    | 27 <sup>#</sup> | 101.62 | 0.92 (0.61, 1.37) | 0.68 | 0.98 (0.64, 1.50) | 0.94 | 0.03 (0.00, 0.45)  | 0.01 | 0.01** |

\*: MR PRESSO method was performed because the p for MR-Egger intercept = 0.05, which identified zero outlier SNPs, and the estimated inverse-variance weighted OR (95%CI) remained 0.88 (0.51, 1.53).

\*\*: MR PRESSO method was performed because the p for MR-Egger intercept < 0.05, which identified 1 outlier SNP (rs62380935), and the estimated inverse-variance weighted OR (95%CI) remained 1.02 (0.72, 1.46). p = 0.10 for the difference between the original IVW estimate and the MR-PRESSO corrected estimate.

#: rs11608727 was not matched in FinnGen.

UKB: UK Biobank. CARDIoGRAMplusC4D: Coronary ARtery Disease Genome wide Replication and Meta-analysis plus The Coronary Artery Disease Genetics) consortium. MEGASTROKE: MEGASTROKE consortium. HERMES: Heart Failure Molecular Epidemiology for Therapeutic Targets consortium. OR (95%CI): odds ratio (95% confidence interval)

Supplementary table S10: Associations between vegetable intake and cardiovascular risk in meta-analysis excluding UK Biobank effect estimates.

|                                | Total n | Event n | Cooked vegetable  |     |      | Raw vegetable     |     |      |
|--------------------------------|---------|---------|-------------------|-----|------|-------------------|-----|------|
|                                |         |         | OR (95%CI)        | I2  | P*   | OR (95%CI)        | I2  | P*   |
| Coronary heart diseases        |         |         |                   |     |      |                   |     |      |
| CARDIoGRAMplusC4D              | 184305  | 60801   | 1.11 (0.75, 1.65) |     |      | 0.86 (0.64, 1.14) |     |      |
| FinnGen                        | 218792  | 21012   | 0.98 (0.70, 1.38) |     |      | 0.93 (0.68, 1.29) |     |      |
| Overall (random-effects model) | 403097  | 81813   | 1.03 (0.80, 1.34) | 0%  | 0.80 | 0.89 (0.72, 1.10) | 0%  | 0.28 |
| Overall (fixed-effect model)   |         |         | 1.03 (0.80, 1.34) |     | 0.80 | 0.89 (0.72, 1.10) |     | 0.28 |
| Stroke                         |         |         |                   |     |      |                   |     |      |
| MEGASTROKE                     | 446696  | 40585   | 1.16 (0.84, 1.60) |     |      | 0.81 (0.64, 1.02) |     |      |
| FinnGen                        | 212947  | 12632   | 0.82 (0.57, 1.18) |     |      | 0.76 (0.56, 1.04) |     |      |
| Overall (random-effects model) | 659643  | 53217   | 1.00 (0.78, 1.27) | 48% | 0.98 | 0.79 (0.66, 0.95) | 0%  | 0.01 |
| Overall (fixed-effect model)   |         |         | 0.99 (0.70, 1.38) |     | 0.94 | 0.79 (0.66, 0.95) |     | 0.01 |
| Ischaemic stroke               |         |         |                   |     |      |                   |     |      |
| MEGASTROKE                     | 440328  | 34217   | 1.10 (0.77, 1.57) |     |      | 0.85 (0.66, 1.10) |     |      |
| FinnGen                        | 212774  | 10551   | 0.80 (0.54, 1.19) |     |      | 0.83 (0.60, 1.13) |     |      |
| Overall (random-effects model) | 653102  | 44768   | 0.95 (0.73, 1.24) | 27% | 0.73 | 0.84 (0.69, 1.03) | 0%  | 0.09 |
| Overall (fixed-effect model)   |         |         | 0.95 (0.70, 1.30) |     | 0.75 | 0.84 (0.69, 1.03) |     | 0.09 |
| Heart failure                  |         |         |                   |     |      |                   |     |      |
| HERMES                         | 977323  | 47309   | 0.92 (0.66, 1.29) |     |      | 0.95 (0.75, 1.20) |     |      |
| FinnGen                        | 195091  | 23701   | 0.85 (0.64, 1.12) |     |      | 0.75 (0.55, 1.03) |     |      |
| Overall (random-effects model) | 1172414 | 71010   | 0.88 (0.71, 1.09) | 0%  | 0.23 | 0.87 (0.72, 1.06) | 27% | 0.16 |

|                                |         |       |                   |    |      |                   |     |      |
|--------------------------------|---------|-------|-------------------|----|------|-------------------|-----|------|
| Overall (fixed-effect model)   |         |       | 0.88 (0.71, 1.09) |    | 0.23 | 0.87 (0.69, 1.09) |     | 0.21 |
| <b>Atrial fibrillation</b>     |         |       |                   |    |      |                   |     |      |
| Nielson 2018                   | 1030836 | 60662 | 1.09 (0.73, 1.63) |    |      | 0.98 (0.74, 1.31) |     |      |
| FinnGen                        | 116926  | 22068 | 1.05 (0.61, 1.80) |    |      | 1.24 (0.90, 1.70) |     |      |
| Overall (random-effects model) | 1147762 | 82730 | 1.08 (0.78, 1.48) | 0% | 0.66 | 1.09 (0.88, 1.35) | 13% | 0.42 |
| Overall (fixed-effect model)   |         |       | 1.08 (0.78, 1.48) |    | 0.66 | 1.09 (0.87, 1.38) |     | 0.45 |

\*: p value for OR.

OR (95%CI) estimates were obtained from the inverse variance weighted methods. OR estimates were for increase of daily one heaped tablespoon of vegetable intake.

Supplementary table S11: Associations between vegetable intake and cardiovascular risk in meta-analysis of univariable Mendelian randomization.

|                                | Total n | Event n | Cooked vegetable  |    |      | Raw vegetable     |    |      |
|--------------------------------|---------|---------|-------------------|----|------|-------------------|----|------|
|                                |         |         | OR (95%CI)        | I2 | P*   | OR (95%CI)        | I2 | P*   |
| Coronary heart diseases        |         |         |                   |    |      |                   |    |      |
| CARDIoGRAMplusC4D              | 184305  | 60801   | 1.09 (0.80, 1.48) |    |      | 0.88 (0.72, 1.08) |    |      |
| FinnGen                        | 218792  | 21012   | 1.07 (0.69, 1.68) |    |      | 1.06 (0.83, 1.35) |    |      |
| UK Biobank                     | 361797  | 37014   | 1.09 (0.68, 1.74) |    |      | 0.87 (0.71, 1.06) |    |      |
| Overall (random-effects model) | 764894  | 118827  | 1.09 (0.87, 1.36) | 0% | 0.47 | 0.92 (0.81, 1.04) | 0% | 0.18 |
| Overall (fixed-effect model)   |         |         | 1.09 (0.87, 1.36) |    | 0.47 | 0.92 (0.81, 1.04) |    | 0.18 |
| Stroke                         |         |         |                   |    |      |                   |    |      |
| MEGASTROKE                     | 446696  | 40585   | 0.99 (0.74, 1.34) |    |      | 0.91 (0.77, 1.07) |    |      |
| FinnGen                        | 212947  | 12632   | 1.03 (0.62, 1.73) |    |      | 0.85 (0.65, 1.12) |    |      |
| UK Biobank                     | 361797  | 9298    | 0.59 (0.24, 1.43) |    |      | 0.92 (0.64, 1.32) |    |      |
| Overall (random-effects model) | 1021440 | 62515   | 0.96 (0.75, 1.23) | 0% | 0.74 | 0.90 (0.79, 1.02) | 0% | 0.10 |
| Overall (fixed-effect model)   |         |         | 0.96 (0.75, 1.23) |    | 0.74 | 0.90 (0.79, 1.02) |    | 0.10 |
| Ischaemic stroke               |         |         |                   |    |      |                   |    |      |
| MEGASTROKE                     | 440328  | 34217   | 0.96 (0.68, 1.36) |    |      | 0.94 (0.79, 1.13) |    |      |
| FinnGen                        | 212774  | 10551   | 0.88 (0.51, 1.53) |    |      | 0.82 (0.62, 1.08) |    |      |
| UK Biobank                     | 361797  | 7264    | 0.69 (0.25, 1.91) |    |      | 0.87 (0.58, 1.31) |    |      |
| Overall (random-effects model) | 1014899 | 52032   | 0.91 (0.69, 1.21) | 0% | 0.54 | 0.90 (0.78, 1.04) | 0% | 0.14 |
| Overall (fixed-effect model)   |         |         | 0.91 (0.69, 1.21) |    | 0.54 | 0.90 (0.78, 1.04) |    | 0.14 |
| Heart failure                  |         |         |                   |    |      |                   |    |      |
| HERMES                         | 977323  | 47309   | 1.38 (1.06, 1.80) |    |      | 1.09 (0.94, 1.27) |    |      |

|                                |         |        |                   |     |      |                   |     |      |
|--------------------------------|---------|--------|-------------------|-----|------|-------------------|-----|------|
| FinnGen                        | 195091  | 23701  | 1.05 (0.75, 1.48) |     |      | 1.14 (0.93, 1.40) |     |      |
| UK Biobank                     | 361797  | 11773  | 0.77 (0.34, 1.75) |     |      | 0.83 (0.60, 1.15) |     |      |
| Overall (random-effects model) | 1534211 | 82783  | 1.18 (0.90, 1.53) | 28% | 0.23 | 1.07 (0.95, 1.20) | 27% | 0.26 |
| Overall (fixed-effect model)   |         |        | 1.21 (0.99, 1.48) |     | 0.07 | 1.07 (0.95, 1.20) |     | 0.26 |
| <b>Atrial fibrillation</b>     |         |        |                   |     |      |                   |     |      |
| Nielson 2018                   | 1030836 | 60662  | 0.98 (0.79, 1.21) |     |      | 1.03 (0.83, 1.29) |     |      |
| FinnGen                        | 116926  | 22068  | 1.22 (0.61, 2.47) |     |      | 1.02 (0.72, 1.46) |     |      |
| UK Biobank                     | 361797  | 25915  | 0.74 (0.42, 1.33) |     |      | 0.82 (0.66, 1.03) |     |      |
| Overall (random-effects model) | 1509559 | 108645 | 0.97 (0.80, 1.17) | 0%  | 0.73 | 0.94 (0.79, 1.11) | 9%  | 0.46 |
| Overall (fixed-effect model)   |         |        | 0.97 (0.80, 1.17) |     | 0.73 | 0.94 (0.81, 1.08) |     | 0.38 |

\*: p value for OR.

OR (95%CI) estimates were obtained from the inverse variance weighted methods. OR estimates were for increase of daily one heaped tablespoon of vegetable intake.

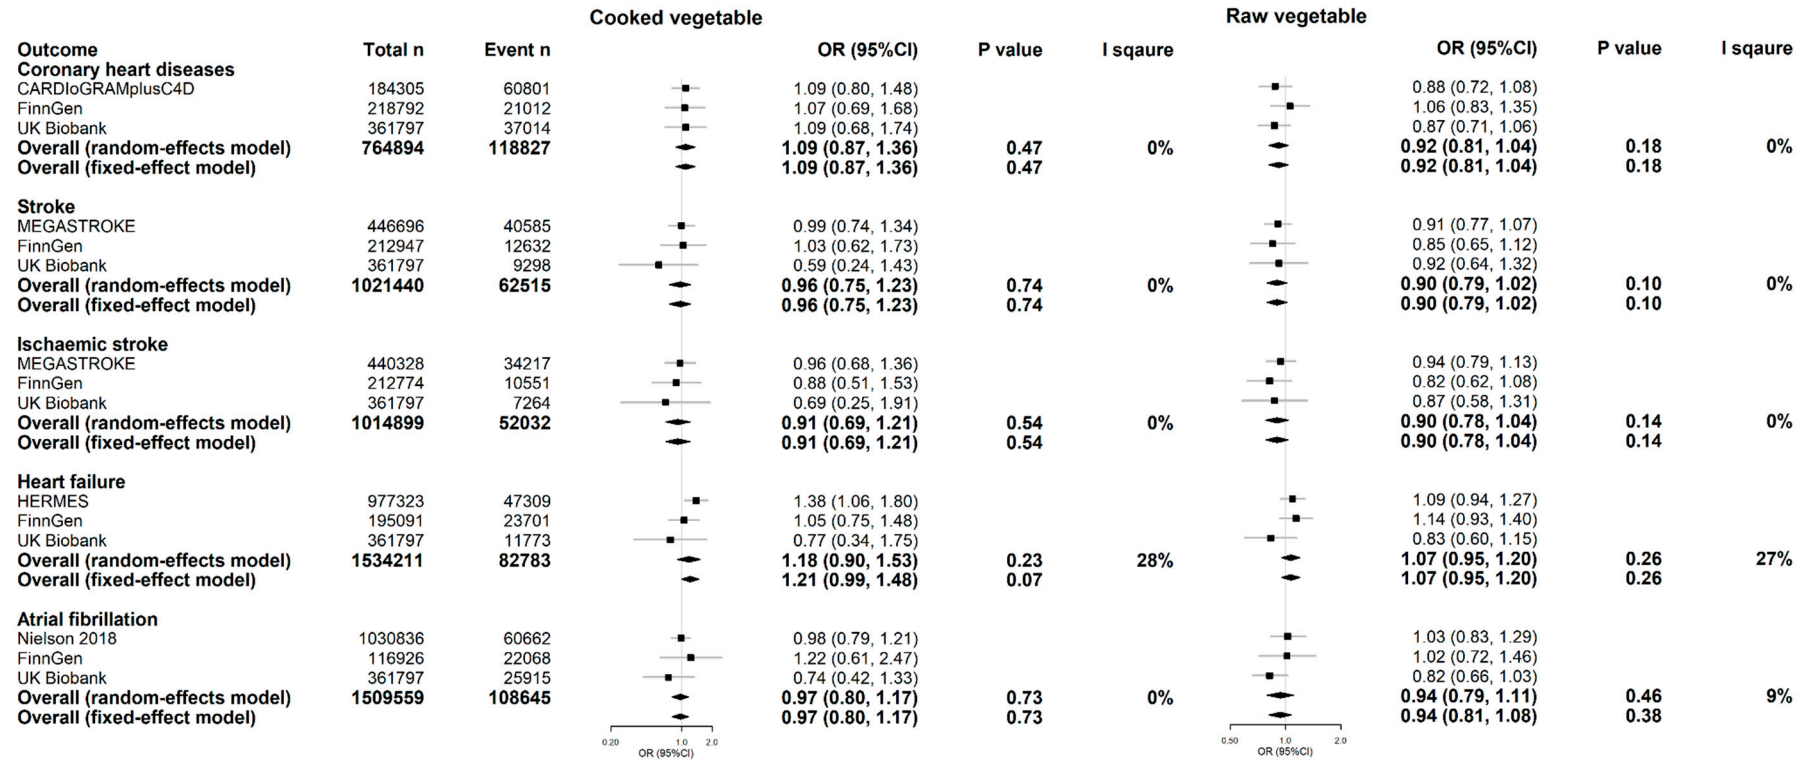

Supplementary figure 4: Associations between vegetable intake and cardiovascular risk in meta-analysis of two- and one-sample univariable Mendelian randomization.

OR (95%CI): odds ratio (95% confidence interval). MR estimates in UK Biobank were obtained from one-sample MR, otherwise two-sample MR.

UKB: UK Biobank. CARDIoGRAMplusC4D: Coronary ARtery Disease Genome wide Replication and Meta-analysis plus The Coronary Artery Disease Genetics consortium. MEGASTROKE: MEGASTROKE consortium. HERMES: Heart Failure Molecular Epidemiology for Therapeutic Targets consortium.

Supplementary table S12: The basic characteristics of the SNPs for cooked and raw vegetable intake included in Mendelian randomization analysis for cardiometabolic risk factors

| SNP                            | Chromosome<br>:position | Effect<br>allele | Other<br>allele | Effect allele<br>frequency | Nearest gene | beta  | se    | p        | F statistics |
|--------------------------------|-------------------------|------------------|-----------------|----------------------------|--------------|-------|-------|----------|--------------|
| <b>Cooked vegetable intake</b> |                         |                  |                 |                            |              |       |       |          |              |
| rs10020708                     | 4:178097496             | C                | A               | 0.51                       | NEIL3        | 0.015 | 0.003 | 2.52E-06 | 22.16        |
| rs10156602                     | 9:96345328              | G                | A               | 0.36                       | PHF2         | 0.020 | 0.003 | 4.66E-09 | 34.33        |
| rs10161952                     | 13:59474383             | A                | C               | 0.69                       | DIAPH3       | 0.017 | 0.004 | 2.60E-06 | 22.09        |
| rs11995369                     | 8:89649177              | C                | T               | 0.20                       | MMP16        | 0.023 | 0.004 | 2.40E-08 | 31.14        |
| rs2211345                      | 1:189995554             | T                | G               | 0.53                       | BRINP3       | 0.016 | 0.003 | 1.01E-06 | 23.91        |
| rs2102738                      | 2:172525884             | A                | C               | 0.83                       | DYNC1I2      | 0.023 | 0.004 | 1.15E-07 | 28.10        |
| rs442291                       | 2:79676305              | C                | T               | 0.39                       | IL1R1        | 0.023 | 0.003 | 4.03E-12 | 48.11        |
| rs6420335                      | 13:69556727             | C                | G               | 0.53                       | KLHL1        | 0.018 | 0.003 | 3.07E-08 | 30.67        |
| rs7521047                      | 1:154076366             | T                | C               | 0.54                       | NUP210L      | 0.019 | 0.003 | 4.75E-09 | 34.27        |
| <b>Raw vegetable intake</b>    |                         |                  |                 |                            |              |       |       |          |              |
| rs1080225                      | 13:59648694             | C                | G               | 0.74                       | DIAPH3       | 0.024 | 0.004 | 4.51E-08 | 29.92        |
| rs11125813                     | 2:59991047              | A                | G               | 0.22                       | BCL11A       | 0.023 | 0.005 | 7.26E-07 | 24.55        |
| rs13255011                     | 8:35051793              | T                | C               | 0.48                       | UNC5D        | 0.021 | 0.004 | 6.54E-08 | 29.20        |
| rs1437761                      | 15:97010698             | T                | C               | 0.75                       | NR2F2        | 0.023 | 0.004 | 1.13E-07 | 28.13        |
| rs1520919                      | 8:64696606              | G                | A               | 0.70                       | YTHDF3       | 0.026 | 0.004 | 7.55E-10 | 37.87        |
| rs2447090                      | 17:2298974              | A                | G               | 0.64                       | MNT          | 0.018 | 0.004 | 4.81E-06 | 20.91        |
| rs2915858                      | 5:166542621             | G                | A               | 0.43                       | TENM2        | 0.022 | 0.004 | 8.80E-09 | 33.09        |
| rs4845364                      | 1:154141908             | G                | A               | 0.49                       | NUP210L      | 0.024 | 0.004 | 1.91E-10 | 40.68        |
| rs3828118                      | 1:82443010              | A                | G               | 0.70                       | ADGRL2       | 0.022 | 0.004 | 2.02E-07 | 26.97        |
| rs6729029                      | 2:176475422             | T                | C               | 0.74                       | LNPK         | 0.022 | 0.004 | 2.12E-07 | 26.89        |
| rs6079589                      | 20:14850762             | C                | T               | 0.78                       | MACROD2      | 0.025 | 0.005 | 3.09E-08 | 30.65        |
| rs10973268                     | 9:37254139              | C                | G               | 0.54                       | ZCCHC7       | 0.021 | 0.004 | 8.42E-08 | 28.80        |
| rs6958768                      | 7:77773693              | A                | C               | 0.83                       | MAGI2        | 0.026 | 0.005 | 6.78E-07 | 24.68        |
| rs7570469                      | 2:79709354              | C                | T               | 0.67                       | CTNNA2       | 0.027 | 0.004 | 2.70E-11 | 44.39        |
| rs3120876                      | 13:55746151             | C                | T               | 0.06                       | PRR20A       | 0.027 | 0.008 | 9.35E-04 | 10.95        |
| rs4838298                      | 9:128629488             | C                | T               | 0.64                       | PBX3         | 0.028 | 0.004 | 1.57E-11 | 48.82        |



|           |             |   |   |      |        |       |       |          |       |
|-----------|-------------|---|---|------|--------|-------|-------|----------|-------|
| rs9323534 | 14:20586432 | C | T | 0.57 | OR4K17 | 0.022 | 0.004 | 2.00E-08 | 31.49 |
| rs9359954 | 6:92318594  | G | T | 0.48 | MAP3K7 | 0.017 | 0.004 | 5.93E-06 | 20.51 |
| rs956362  | 15:35927655 | G | A | 0.21 | DPH6   | 0.020 | 0.005 | 2.40E-05 | 17.84 |

---

SNP: single nucleotide polymorphism.

Supplementary table S13: Association between vegetable intake and cardiometabolic risk factors in univariable Mendelian randomization

|                  | SNP | F statistics | Inverse-variance weighted method |      |                            | Weighted median method |      | MR-Egger method      |        |                        |
|------------------|-----|--------------|----------------------------------|------|----------------------------|------------------------|------|----------------------|--------|------------------------|
|                  |     |              | Beta (95%CI)                     | p    | P <sub>heterogeneity</sub> | Beta (95%CI)           | p    | Beta (95%CI)         | p      | P <sub>intercept</sub> |
| TC               |     |              |                                  |      |                            |                        |      |                      |        |                        |
| Cooked vegetable | 9   | 30.53        | -0.07 (-0.23, 0.08)              | 0.34 | 0.96                       | -0.10 (-0.29, 0.10)    | 0.34 | -0.03 (-1.05, 0.99)  | 0.96   | 0.93                   |
| Raw vegetable    | 19  | 29.28        | -0.04 (-0.17, 0.09)              | 0.54 | 0.13                       | -0.11 (-0.27, 0.06)    | 0.21 | 0.81 (-0.11, 1.73)   | 0.08   | 0.07                   |
| TG               |     |              |                                  |      |                            |                        |      |                      |        |                        |
| Cooked vegetable | 9   | 30.53        | -0.06 (-0.27, 0.15)              | 0.59 | 0.03                       | -0.11 (-0.33, 0.12)    | 0.35 | -0.71 (-2.10, 0.68)  | 0.31   | 0.35                   |
| Raw vegetable    | 19  | 29.28        | -0.05 (-0.15, 0.05)              | 0.33 | 0.56                       | 0.01 (-0.13, 0.16)     | 0.84 | -0.43 (-1.19, 0.34)  | 0.27   | 0.33                   |
| HDL              |     |              |                                  |      |                            |                        |      |                      |        |                        |
| Cooked vegetable | 9   | 30.53        | 0.05 (-0.11, 0.22)               | 0.51 | 0.31                       | -0.06 (-0.27, 0.16)    | 0.60 | 0.60 (-0.45, 1.66)   | 0.26   | 0.30                   |
| Raw vegetable    | 19  | 29.28        | 0.04 (-0.06, 0.15)               | 0.42 | 0.44                       | 0.05 (-0.10, 0.20)     | 0.50 | 0.08 (-0.73, 0.89)   | 0.85   | 0.93                   |
| LDL              |     |              |                                  |      |                            |                        |      |                      |        |                        |
| Cooked vegetable | 9   | 30.53        | -0.02 (-0.18, 0.14)              | 0.79 | 0.84                       | -0.02 (-0.23, 0.18)    | 0.83 | -0.26 (-1.30, 0.79)  | 0.63   | 0.66                   |
| Raw vegetable    | 19  | 29.28        | -0.04 (-0.20, 0.11)              | 0.58 | 0.01                       | -0.06 (-0.23, 0.11)    | 0.50 | 0.71 (-0.43, 1.85)   | 0.22   | 0.19                   |
| BMI              |     |              |                                  |      |                            |                        |      |                      |        |                        |
| Cooked vegetable | 9   | 30.53        | -0.12 (-0.27, 0.02)              | 0.09 | 0.21                       | -0.20 (-0.37, -0.03)   | 0.02 | -0.56 (-1.53, 0.42)  | 0.26   | 0.38                   |
| Raw vegetable    | 19  | 29.28        | 0.05 (-0.05, 0.16)               | 0.33 | 0.04                       | -0.01 (-0.12, 0.11)    | 0.91 | -0.98 (-1.66, -0.30) | < 0.01 | < 0.01*                |
| OGTT             |     |              |                                  |      |                            |                        |      |                      |        |                        |
| Cooked vegetable | 9   | 30.53        | 0.04 (-0.26, 0.34)               | 0.77 | 0.57                       | 0.09 (-0.32, 0.50)     | 0.67 | -0.75 (-2.75, 1.25)  | 0.46   | 0.43                   |

|                      |    |       |                      |      |      |                      |      |                       |      |        |
|----------------------|----|-------|----------------------|------|------|----------------------|------|-----------------------|------|--------|
| Raw vegetable FG     | 19 | 29.28 | -0.23 (-0.42, -0.04) | 0.02 | 0.70 | -0.29 (-0.56, -0.02) | 0.03 | -0.74 (-2.24, 0.76)   | 0.33 | 0.50   |
| Cooked vegetable Raw | 9  | 30.53 | 0.01 (-0.07, 0.09)   | 0.85 | 0.09 | 0.02 (-0.07, 0.11)   | 0.69 | -0.32 (-0.86, 0.22)   | 0.24 | 0.23   |
| vegetable FI         | 19 | 29.28 | 0.04 (-0.02, 0.09)   | 0.18 | 0.02 | 0.04 (-0.02, 0.10)   | 0.22 | 0.23 (-0.20, 0.65)    | 0.29 | 0.38   |
| Cooked vegetable Raw | 9  | 30.53 | 0.03 (-0.04, 0.11)   | 0.36 | 0.47 | 0.02 (-0.07, 0.12)   | 0.61 | -0.27 (-0.75, 0.21)   | 0.27 | 0.21   |
| HbA1c                | 19 | 29.28 | 0.01 (-0.04, 0.06)   | 0.79 | 0.18 | 0.01 (-0.05, 0.08)   | 0.74 | 0.46 (0.11, 0.82)     | 0.01 | 0.01** |
| Cooked vegetable Raw | 9  | 30.53 | -0.02 (-0.07, 0.03)  | 0.43 | 0.85 | -0.01 (-0.08, 0.05)  | 0.64 | 0.09 (-0.23, 0.42)    | 0.57 | 0.49   |
| vegetable SBP        | 19 | 29.28 | -0.02 (-0.05, 0.00)  | 0.09 | 0.50 | -0.04 (-0.08, 0.01)  | 0.10 | -0.14 (-0.37, 0.10)   | 0.25 | 0.34   |
| Cooked vegetable Raw | 9  | 30.53 | -1.05 (-4.31, 2.20)  | 0.53 | 0.04 | -1.67 (-5.05, 1.71)  | 0.33 | -4.90 (-28.17, 18.38) | 0.68 | 0.74   |
| vegetable DBP        | 19 | 29.28 | -0.39 (-2.08, 1.30)  | 0.65 | 0.10 | -1.48 (-3.53, 0.58)  | 0.16 | 3.93 (-9.71, 17.58)   | 0.57 | 0.53   |
| Cooked vegetable Raw | 9  | 30.53 | -0.89 (-2.73, 0.95)  | 0.34 | 0.10 | -0.16 (-2.30, 1.99)  | 0.89 | 0.13 (-13.10, 13.37)  | 0.98 | 0.88   |
| PP                   | 19 | 29.28 | -0.50 (-1.54, 0.54)  | 0.34 | 0.10 | -0.29 (-1.56, 0.97)  | 0.65 | -1.98 (-10.42, 6.46)  | 0.65 | 0.73   |
| Cooked vegetable Raw | 9  | 30.53 | -0.58 (-3.09, 1.93)  | 0.65 | 0.01 | -0.89 (-3.35, 1.57)  | 0.48 | -6.81 (-24.27, 10.65) | 0.44 | 0.48   |
| vegetable            | 19 | 29.28 | -0.18 (-1.28, 0.92)  | 0.75 | 0.14 | -0.69 (-2.05, 0.67)  | 0.32 | 4.26 (-4.44, 12.96)   | 0.34 | 0.31   |

SNP: single nucleotide polymorphism. TC: total cholesterol. TG: triglyceride. HDL: high density lipoprotein. LDL: low density lipoprotein. BMI: body mass index. OGTT: 2-hour glucose after oral glucose tolerance test. FG: fasting glucose. FI: fasting insulin. HbA1c: glycated haemoglobin. SBP: systolic blood pressure. DBP: diastolic blood pressure. PP: pulse pressure.

\*BMI: P for MR-Egger intercept < 0.05, MR-PRESSO method was performed and identified 1 outlier SNP (rs6729029); the MR-PRESSO corrected estimate was 0.02 (-0.07, 0.11), p for distortion test 0.65.

\*\*FI: P for MR-Egger intercept < 0.05, MR-PRESSO method was performed and identified 0 outlier SNPs; the MR-PRESSO corrected estimate remained 0.01 (-0.04, 0.06).

(A) Cooked vegetable intake -- TG

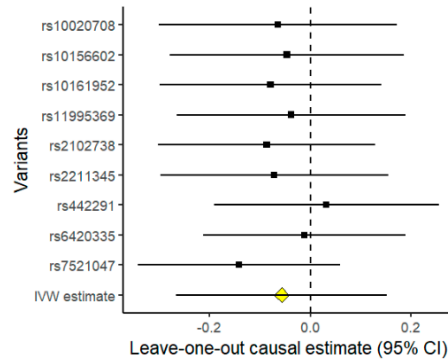

(B) Cooked vegetable intake -- SBP

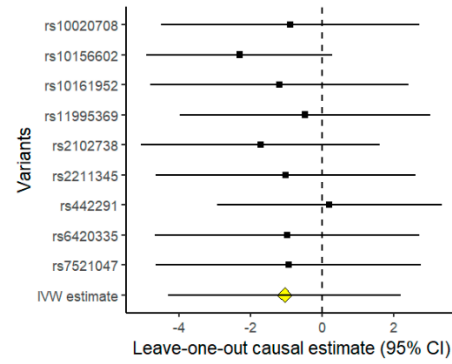

(C) Cooked vegetable intake -- PP

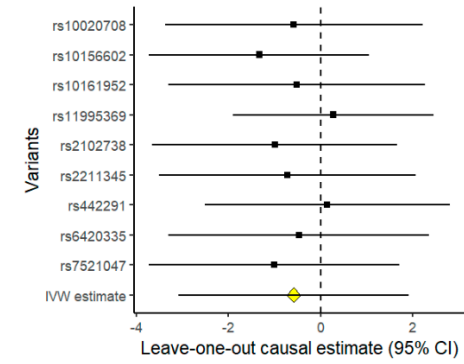

(D) Raw vegetable intake -- LDL

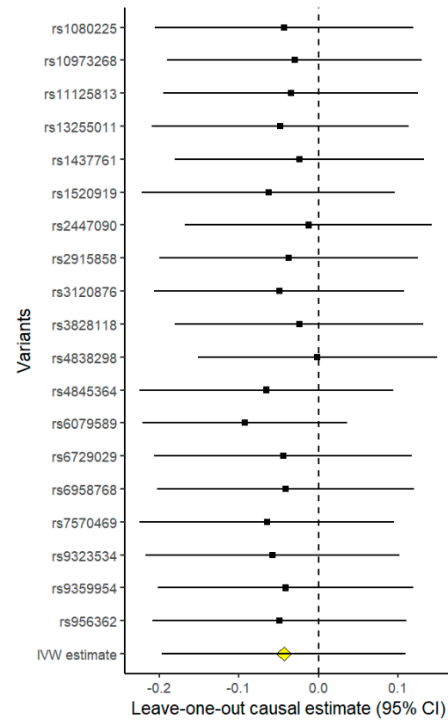

(E) Raw vegetable intake -- BMI

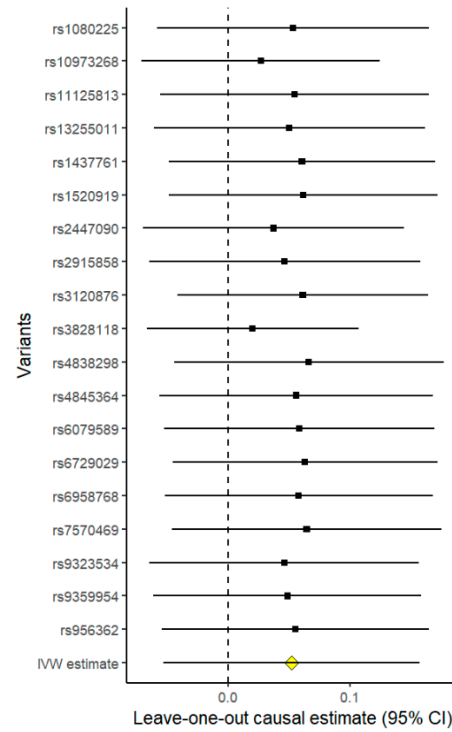

(F) Raw vegetable intake -- FG

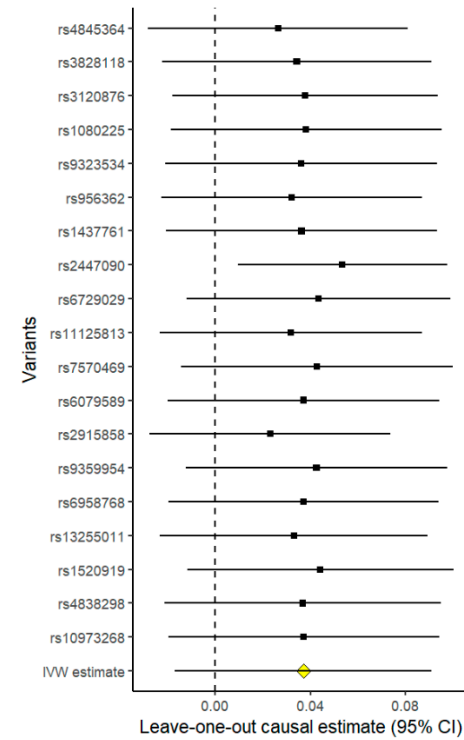

Supplementary figure S5: Forest plots for the leave-one-out analysis for selected genetic associations between vegetable intake and cardiometabolic risk factors.

TG: triglyceride. LDL: low density lipoprotein. BMI: body mass index. FG: fasting glucose. FI: fasting insulin. SBP: systolic blood pressure. PP: pulse pressure. Removing the SNP (rs2447090) for raw vegetable intake-FG association, the effect was 0.05 (0.01, 0.10;  $p = 0.02$ ), not passing the Bonferroni corrected significance level (0.002).

Supplementary table S14: Association between vegetable intake and body mass index, serum lipids in multivariable Mendelian randomization

|                  | Inverse-variance weighted method |      |                            | MR-Egger method     |      |                        | Median Method       |      |
|------------------|----------------------------------|------|----------------------------|---------------------|------|------------------------|---------------------|------|
|                  | Beta (95%CI)                     | p    | P <sub>heterogeneity</sub> | Beta (95%CI)        | p    | P <sub>intercept</sub> | Beta (95%CI)        | p    |
| TC               |                                  |      |                            |                     |      |                        |                     |      |
| Cooked vegetable | -0.06 (-0.30, 0.18)              | 0.62 | 0.40                       | -0.01 (-0.35, 0.33) | 0.96 | 0.68                   | 0.01 (-0.31, 0.33)  | 0.96 |
| Raw vegetable    | -0.02 (-0.20, 0.16)              | 0.84 |                            | 0.03 (-0.26, 0.31)  | 0.85 |                        | -0.11 (-0.36, 0.14) | 0.41 |
| TG               |                                  |      |                            |                     |      |                        |                     |      |
| Cooked vegetable | -0.12 (-0.36, 0.13)              | 0.35 | 0.17                       | -0.16 (-0.51, 0.18) | 0.36 | 0.71                   | -0.25 (-0.56, 0.07) | 0.13 |
| Raw vegetable    | 0.03 (-0.15, 0.22)               | 0.71 |                            | -0.01 (-0.30, 0.28) | 0.95 |                        | 0.16 (-0.07, 0.39)  | 0.17 |
| HDL              |                                  |      |                            |                     |      |                        |                     |      |
| Cooked vegetable | 0.07 (-0.16, 0.29)               | 0.57 | 0.43                       | 0.26 (-0.05, 0.57)  | 0.1  | 0.08                   | -0.14 (-0.46, 0.19) | 0.41 |
| Raw vegetable    | 0.02 (-0.15, 0.18)               | 0.84 |                            | 0.20 (-0.06, 0.46)  | 0.14 |                        | 0.12 (-0.12, 0.35)  | 0.33 |
| LDL              |                                  |      |                            |                     |      |                        |                     |      |
| Cooked vegetable | 0.00 (-0.29, 0.29)               | 0.99 | 0.06                       | 0.07 (-0.34, 0.48)  | 0.74 | 0.65                   | 0.06 (-0.30, 0.42)  | 0.74 |
| Raw vegetable    | -0.04 (-0.26, 0.18)              | 0.72 |                            | 0.02 (-0.32, 0.36)  | 0.9  |                        | -0.06 (-0.35, 0.22) | 0.66 |
| BMI              |                                  |      |                            |                     |      |                        |                     |      |
| Cooked vegetable | -0.18 (-0.41, 0.05)              | 0.13 | 0.02                       | -0.31 (-0.63, 0.01) | 0.06 | 0.25                   | -0.21 (-0.47, 0.05) | 0.12 |
| Raw vegetable    | 0.12 (-0.05, 0.29)               | 0.15 |                            | -0.00 (-0.28, 0.27) | 0.98 |                        | 0.09 (-0.11, 0.28)  | 0.38 |
| OGTT             |                                  |      |                            |                     |      |                        |                     |      |
| Cooked vegetable | 0.22 (-0.20, 0.64)               | 0.31 | 0.75                       | -0.06 (-0.66, 0.54) | 0.85 | 0.20                   | 0.29 (-0.27, 0.85)  | 0.31 |

|                            |                      |      |       |                      |      |      |                     |      |
|----------------------------|----------------------|------|-------|----------------------|------|------|---------------------|------|
| Raw<br>vegetable<br>FG     | -0.33 (-0.64, -0.01) | 0.04 |       | -0.59 (-1.11, -0.08) | 0.02 |      | -0.27 (-0.68, 0.15) | 0.21 |
| Cooked<br>vegetable<br>Raw | 0.01 (-0.11, 0.13)   | 0.84 | 0.01* | 0.06 (-0.11, 0.23)   | 0.52 | 0.48 | 0.01 (-0.11, 0.14)  | 0.85 |
| Raw<br>vegetable<br>FI     | 0.03 (-0.06, 0.11)   | 0.56 |       | 0.07 (-0.08, 0.21)   | 0.36 |      | 0.03 (-0.06, 0.12)  | 0.49 |
| Cooked<br>vegetable<br>Raw | 0.02 (-0.09, 0.13)   | 0.71 | 0.21  | 0.04 (-0.12, 0.20)   | 0.62 | 0.74 | 0.01 (-0.14, 0.15)  | 0.90 |
| Raw<br>vegetable<br>HbA1c  | 0.00 (-0.08, 0.08)   | 0.99 |       | 0.02 (-0.12, 0.16)   | 0.79 |      | 0.01 (-0.09, 0.12)  | 0.79 |
| Cooked<br>vegetable<br>Raw | -0.01 (-0.08, 0.06)  | 0.74 | 0.73  | -0.02 (-0.11, 0.07)  | 0.66 | 0.76 | 0.00 (-0.08, 0.09)  | 0.98 |
| Raw<br>vegetable<br>SBP    | -0.02 (-0.07, 0.03)  | 0.47 |       | -0.03 (-0.11, 0.05)  | 0.5  |      | -0.02 (-0.08, 0.04) | 0.51 |
| Cooked<br>vegetable<br>Raw | -2.43 (-6.36, 1.49)  | 0.23 | 0.04  | -3.70 (-9.41, 2.00)  | 0.21 | 0.55 | -0.76 (-5.49, 3.97) | 0.75 |
| Raw<br>vegetable<br>DBP    | 0.94 (-1.91, 3.78)   | 0.52 |       | -0.31 (-5.24, 4.63)  | 0.9  |      | -0.97 (-4.31, 2.38) | 0.57 |
| Cooked<br>vegetable<br>Raw | -1.04 (-3.38, 1.29)  | 0.38 | 0.07  | -3.15 (-6.37, 0.07)  | 0.06 | 0.07 | -1.95 (-4.99, 1.09) | 0.21 |
| Raw<br>vegetable<br>PP     | -0.12 (-1.81, 1.57)  | 0.89 |       | -2.18 (-4.97, 0.60)  | 0.13 |      | 0.72 (-1.39, 2.84)  | 0.51 |
| Cooked<br>vegetable<br>Raw | -1.56 (-4.32, 1.20)  | 0.27 | 0.02  | -1.00 (-5.02, 3.02)  | 0.63 | 0.71 | -1.12 (-4.76, 2.51) | 0.55 |
| Raw<br>vegetable           | 0.82 (-1.18, 2.81)   | 0.42 |       | 1.37 (-2.11, 4.85)   | 0.44 |      | -0.14 (-2.62, 2.35) | 0.91 |



TC: total cholesterol. TG: triglyceride. HDL: high density lipoprotein. LDL: low density lipoprotein. BMI: body mass index. OGTT: 2-hour glucose after oral glucose tolerance test. FG: fasting glucose. FI: fasting insulin. HbA1c: glycated haemoglobin. SBP: systolic blood pressure. DBP: diastolic blood pressure. PP: pulse pressure.

\*: removing the potential outlier SNP rs2447090 yielded -0.01 (-0.10, 0.10;  $p = 0.97$ ) and 0.05 (-0.03, 0.12;  $p = 0.23$ ) for cooked and raw vegetable intake, respectively.
